# Supplementary material for: A latent profile analysis of affiliate stigma in family caregivers of patients with dementia
Source: Research Square preprint supplement (doi:10.21203/rs.3.rs-8171732/v1), 2025-12-31
Supplement: Supplementary file 1 [file ba20aef5302769f8a63158de.xlsx]

## Sheet: Sheet1
1、性别	2、年龄（ ） 岁	3、医保类型	4、疾病严重程度	5、是否伴有其他疾病	@1、性别	@2、年龄岁	@4、婚姻	@5、学历	@6、就业状态	@7、长期居住地	@8、监护关系	@9、您已照顾患者的时间	@10、每日照顾患者时间	@11、家庭人均月收入	@1、认知维度—1、如果我和痴呆家人在一起其他	@2、因为我家里有一个患有痴呆症的家庭成员，	@3、当我和患有痴呆症的家人在一起时，人们对	@4、有个患有痴呆症的家庭成员对我有负面影响	@5、家里有一个人患有痴呆症，这让我觉得自己	@6、家里有一个人患有痴呆症，这让我觉得自己	@7、家里有一个人患有痴呆症，这让我很丢脸情	@2、情绪维度—1、因为我的一个家庭成员有痴呆	@2、因为我的家人患有痴呆症，我感到很不安	@3、我的家庭成员患有痴呆症的行为让我尴尬	@4、因为我的家人患有痴呆症，我感到很无助	@5、因为我的家人患有痴呆症，我感到悲伤	@6、我担心别人是否知道我的家人患有痴呆症	@7、因为我的家人患有痴呆症，我现在压力很大	@3、行为维度—1、我避免与患有痴呆症的家人交	@2、我不敢告诉别人我的家人得了痴呆症	@3、我已经减少了和患有痴呆症的家人外出的次	@4、由于我的家庭成员患有痴呆症，我减少了与	@5、当我和患有痴呆症的家人在一起时，我特别	@6、我减少了与患有痴呆症的家人的联系	@7、我不敢参加与痴呆有关的活动，以免别人怀	@8、由于我的家庭成员患有痴呆症，我减少了与	@1、本量表共四题，每题均有五个选项，请选择	我完全不会想有关照顾病人的事	我远离我照顾病人的工作	我从照顾病人的压力中抽身并得到休息	@1、您有多少关系密切，可以得到关心和支持的	@2、近一年来您	@3、您与邻居	@4、您与同事	@5、从家庭成员得到的支持和帮助—夫妻（恋人	父母	儿女	兄弟姐妹	其他成员（如嫂子）
男	75	城镇医保	轻度	是	2	74	1	1	2	1	1	4	3	3	1	1	1	1	1	1	1	1	1	1	1	1	1	1	1	1	1	1	1	1	1	1	5	5	5	5	4	4	4	4	4	4	4	4	4
男	94	新农合	中度	是	2	59	1	2	2	2	2	3	4	3	1	1	1	1	1	1	1	1	1	1	1	1	1	1	1	1	1	1	1	1	1	1	5	5	4	4	4	4	4	3	4	4	4	4	4
男	83	城镇医保	中度	是	2	75	1	3	3	1	1	4	4	3	1	1	1	1	1	1	1	1	1	1	1	1	1	1	1	1	1	1	1	1	1	1	5	5	4	4	3	4	4	4	4	4	4	4	4
男	80	城镇医保	轻度	是	1	47	1	3	1	1	2	3	3	4	1	1	1	1	1	1	1	1	1	1	1	1	1	1	1	1	1	1	1	1	1	1	4	4	4	5	4	4	4	3	3	4	4	4	4
男	88	城镇医保	重度	否	1	62	1	2	1	1	2	2	3	3	1	1	1	1	1	1	1	1	1	1	1	1	1	1	1	1	1	1	1	1	1	1	4	3	5	4	4	4	4	4	4	4	3	4	4
男	91	城镇医保	中度	是	2	49	3	2	1	1	2	4	3	4	1	1	1	1	1	1	1	1	1	1	1	1	1	1	1	1	1	1	1	1	1	1	4	4	4	4	3	3	4	4	4	4	4	3	4
女	68	城镇医保	轻度	是	2	53	1	2	1	1	3	2	2	3	1	1	1	1	1	1	1	1	1	1	1	1	1	1	1	1	1	1	1	1	1	1	4	4	4	4	3	4	4	4	4	3	4	3	4
女	70	新农合	中度	是	2	47	1	1	1	2	2	1	1	1	1	1	1	1	1	1	1	1	1	1	1	1	1	1	1	1	1	1	1	1	1	1	4	3	4	5	4	3	4	3	3	4	4	4	4
女	73	新农合	中度	是	1	48	1	2	1	2	2	2	1	2	1	1	1	1	1	1	1	1	1	1	1	1	1	1	1	1	1	1	1	1	1	1	1	1	1	1	3	4	4	3	4	4	4	3	4
女	70	城镇医保	可疑	是	1	50	1	2	1	1	2	2	2	3	1	1	1	1	1	1	1	1	1	1	1	1	1	1	1	1	1	1	1	1	1	1	1	1	1	1	4	4	4	4	4	3	4	4	3
男	62	城镇医保	轻度	是	2	40	1	2	2	2	2	2	3	3	1	1	1	1	1	1	1	1	1	1	1	1	1	1	1	1	1	1	1	1	1	1	1	1	1	1	4	4	4	4	3	4	3	4	4
男	70	城镇医保	轻度	是	2	31	1	2	2	1	3	1	1	3	1	1	1	1	1	1	1	1	1	1	1	1	1	1	1	1	1	1	1	1	1	1	1	1	1	1	4	3	4	4	4	4	3	4	4
女	65	城镇医保	轻度	是	1	42	1	2	1	2	2	3	3	1	1	1	1	1	1	1	1	1	1	1	1	1	1	1	1	1	1	1	1	1	1	1	1	1	1	1	1	4	1	1	1	4	1	1	1
男	75	城镇医保	轻度	是	1	37	1	2	1	2	1	2	1	3	1	1	1	1	1	1	1	1	1	1	1	1	1	1	1	1	1	1	1	1	1	1	1	1	1	1	1	1	1	1	1	3	1	3	1
男	71	城镇医保	可疑	否	2	43	1	2	2	1	3	1	2	4	1	1	1	1	1	1	1	1	1	1	1	1	1	1	1	1	1	1	1	1	1	1	1	1	1	1	1	4	1	2	1	4	1	1	1
男	74	新农合	轻度	否	1	48	1	2	1	1	3	1	1	4	1	1	1	1	1	1	1	1	1	1	1	1	1	1	1	1	1	1	1	1	1	1	1	1	1	1	1	1	1	1	3	3	3	3	3
女	90	城镇医保	轻度	否	1	20	2	2	2	1	3	1	1	4	1	1	1	1	1	1	1	1	1	1	1	1	1	1	1	1	1	1	1	1	1	1	1	1	1	1	3	4	1	1	2	3	1	1	2
女	80	新农合	轻度	否	2	50	1	2	2	2	2	1	1	2	1	1	1	1	1	1	1	1	1	1	1	1	1	1	1	1	1	1	1	1	1	1	1	1	1	1	1	4	1	2	3	1	4	1	1
男	71	新农合	轻度	否	2	71	1	1	2	2	1	2	4	2	1	1	1	1	1	1	1	1	1	1	1	1	1	1	1	1	1	1	1	1	1	1	1	1	1	1	2	1	1	1	2	1	3	3	3
男	74	新农合	轻度	否	2	49	1	2	1	1	2	1	1	4	1	1	1	1	1	1	1	1	1	1	1	1	1	1	1	1	1	1	1	1	1	1	4	4	4	4	2	2	2	2	2	2	2	2	2
男	65	城镇医保	轻度	否	2	62	1	1	1	1	1	4	3	2	1	1	1	1	1	1	1	1	1	1	1	1	1	1	1	1	1	1	1	1	1	1	2	5	4	5	1	4	2	1	1	1	4	2	2
男	79	新农合	中度	是	1	47	1	3	1	2	2	2	1	3	1	1	1	1	1	1	1	1	1	1	1	1	1	1	1	1	1	1	2	1	1	1	4	4	4	4	1	4	3	1	1	1	4	3	3
男	48	新农合	轻度	是	1	78	1	2	1	2	2	2	1	2	1	1	1	1	1	1	1	1	1	1	1	3	1	1	1	1	1	1	1	1	1	1	3	4	5	3	2	2	1	2	3	3	3	1	3
女	84	新农合	正常	否	2	83	3	1	2	2	2	4	4	3	1	1	1	1	1	1	1	1	1	1	1	1	1	2	2	1	1	1	1	1	1	1	4	3	4	4	3	1	1	3	1	4	1	1	1
男	83	新农合	中度	否	1	48	1	1	1	2	3	4	2	2	1	1	1	1	1	1	1	1	1	1	2	1	1	2	1	1	1	1	1	1	1	1	4	3	4	4	4	4	4	4	4	4	4	4	3
男	56	城镇医保	中度	否	1	20	2	4	2	1	2	1	2	3	1	1	1	1	1	1	1	1	1	1	1	1	1	3	1	1	1	1	1	1	1	1	3	3	4	5	4	4	4	4	4	4	4	4	4
女	55	城镇医保	正常	否	2	20	2	2	1	1	2	2	1	4	1	1	1	1	1	1	1	2	1	1	1	1	1	1	1	1	1	2	1	1	1	2	3	3	5	4	4	4	4	4	4	4	4	4	4
女	19	城镇医保	正常	否	1	48	1	2	1	1	3	1	2	4	1	1	1	1	1	1	1	2	1	1	1	1	1	1	1	1	1	2	1	1	1	2	4	3	4	4	4	4	4	4	4	4	4	4	4
男	72	城镇医保	中度	是	1	48	1	2	1	1	2	3	1	4	1	1	1	1	1	1	1	1	1	1	1	4	1	1	1	1	1	1	1	1	1	1	4	3	4	4	3	4	4	4	4	4	4	4	4
女	65	城镇医保	轻度	否	2	36	1	2	1	1	2	1	2	3	2	2	2	1	1	1	1	1	1	1	1	1	1	1	1	1	1	1	1	1	1	1	4	3	4	4	4	4	3	4	4	4	4	4	4
女	62	新农合	中度	是	1	35	1	2	1	2	2	2	2	2	1	1	1	1	1	1	1	1	1	1	2	3	1	1	1	1	1	1	1	1	1	1	5	4	3	3	3	4	3	4	3	4	4	3	3
女	93	城镇医保	中度	否	1	61	1	2	1	2	2	4	2	3	2	1	2	1	1	1	1	1	1	1	1	2	2	2	1	1	1	1	1	1	1	1	5	4	2	4	3	4	4	4	3	4	4	3	4
女	76	新农合	中度	是	1	48	1	2	1	2	2	3	2	3	1	1	1	1	3	1	1	1	1	1	1	4	1	1	1	1	1	1	1	1	1	1	4	2	4	5	4	4	4	3	4	4	3	3	4
男	77	城镇医保	轻度	是	1	45	1	3	1	1	2	3	1	4	1	1	1	1	1	1	1	1	3	1	2	1	1	2	1	1	2	1	1	1	1	1	5	1	5	4	4	3	4	4	3	4	3	3	3
女	85	城镇医保	轻度	是	1	50	1	2	2	2	2	4	1	2	2	1	2	1	1	1	1	1	1	1	1	2	2	2	1	1	1	1	1	1	1	1	4	3	4	4	3	4	4	4	4	4	4	4	4
女	18	新农合	正常	否	2	20	2	2	1	2	3	1	2	1	2	1	2	1	1	1	1	1	1	1	1	2	2	2	1	1	1	1	1	1	1	1	4	3	4	4	2	4	2	2	3	4	4	4	4
女	91	城镇医保	轻度	否	1	21	2	4	1	1	3	2	2	2	2	1	2	1	1	1	1	1	1	1	1	2	2	2	1	1	1	1	1	1	1	1	3	3	4	4	4	4	4	4	4	4	4	4	4
男	81	城镇医保	重度	是	1	58	1	2	1	1	2	4	2	2	1	1	1	1	1	1	1	1	3	1	1	1	1	1	1	1	3	1	1	1	1	3	1	1	1	1	4	4	4	4	4	4	4	4	3
女	83	城镇医保	轻度	是	2	56	1	2	2	1	2	2	2	2	1	1	1	1	1	1	1	1	1	1	1	3	1	3	1	1	3	1	1	1	1	1	1	1	1	1	4	4	3	4	4	4	4	4	4
男	80	城镇医保	轻度	是	2	46	1	3	1	1	2	2	1	3	1	1	1	1	1	1	1	1	1	1	3	3	1	3	1	1	1	1	1	1	1	1	1	1	1	1	4	4	4	4	4	4	4	4	4
男	23	城镇医保	正常	否	1	23	2	4	2	1	3	1	1	3	1	1	1	1	1	1	1	1	1	1	1	1	1	4	1	1	1	4	1	1	1	1	1	1	1	1	4	4	3	3	4	4	3	4	4
男	82	城镇医保	中度	是	1	23	2	4	2	1	3	2	1	3	1	1	1	2	1	1	1	1	2	1	1	1	1	2	1	1	1	2	2	2	2	1	3	3	4	4	4	3	3	4	3	4	3	3	4
女	65	城镇医保	轻度	否	2	36	1	2	1	1	3	1	2	3	1	2	2	2	2	2	1	1	1	2	2	2	1	1	1	1	1	1	1	1	1	1	4	2	4	4	3	3	3	3	3	4	4	4	4
女	77	新农合	轻度	否	1	61	1	1	3	2	1	2	3	2	1	1	1	1	1	1	1	2	2	2	2	1	1	1	2	2	2	2	1	1	1	1	2	3	5	4	3	4	4	3	4	4	3	4	3
男	85	城镇医保	轻度	否	2	48	1	1	1	1	2	3	3	3	1	1	1	1	1	1	1	1	2	2	3	3	1	3	1	1	1	1	1	1	1	1	4	3	3	4	4	4	4	4	3	4	4	3	4
男	70	城镇医保	轻度	否	2	40	2	2	1	1	3	2	2	3	2	1	1	1	1	1	1	1	1	1	1	1	1	2	1	2	1	2	3	2	2	2	4	3	3	4	4	4	3	3	3	4	3	4	4
女	73	新农合	中度	否	1	49	1	1	3	2	2	4	3	2	1	1	1	1	1	1	1	2	3	2	2	3	2	2	1	1	1	1	1	1	1	1	4	3	3	4	4	3	4	3	3	4	3	4	3
女	75	城镇医保	中度	是	2	20	2	4	2	1	3	2	1	3	1	2	1	2	1	1	1	1	2	1	3	1	1	1	2	2	3	1	1	1	1	1	4	3	3	4	3	3	3	4	3	4	4	4	4
男	68	城镇医保	中度	否	2	42	1	2	1	2	3	2	2	3	1	1	1	1	1	1	1	2	3	3	2	2	2	2	1	1	1	1	1	1	1	1	1	1	1	1	3	3	4	4	4	4	3	3	4
男	86	城镇医保	可疑	是	2	52	1	2	1	1	2	1	2	3	1	2	1	2	1	1	1	1	2	1	3	1	1	2	2	2	3	1	1	1	1	1	1	1	1	1	4	4	4	4	4	4	3	3	4
女	77	新农合	可疑	是	1	75	1	3	3	2	1	2	1	3	1	1	1	1	1	1	1	1	1	1	1	1	1	3	2	1	3	4	1	3	1	1	1	1	1	1	4	4	4	4	3	4	3	3	4
男	75	自费	中度	否	1	42	1	2	2	2	2	2	2	2	2	2	2	2	2	2	1	1	2	2	1	3	1	1	1	1	1	1	1	1	1	1	1	1	1	1	3	3	4	4	4	4	4	3	4
女	61	城镇医保	重度	是	2	40	1	1	1	2	3	4	4	2	1	1	1	1	1	1	1	1	1	1	2	2	2	3	1	1	1	1	3	2	2	2	1	1	1	1	1	1	2	3	2	2	2	2	2
女	65	城镇医保	中度	是	1	48	1	2	1	2	2	2	1	3	2	2	2	1	1	1	1	1	1	1	1	2	2	1	1	1	3	3	2	1	1	2	1	1	1	1	2	1	1	1	3	2	2	2	2
女	50	城镇医保	可疑	否	2	27	2	3	1	2	2	1	1	3	1	1	1	1	1	1	1	1	1	2	1	1	1	1	2	3	3	3	3	2	1	1	1	1	1	1	3	3	3	3	1	1	1	1	1
男	72	城镇医保	中度	是	2	55	1	1	2	1	2	2	3	3	1	1	1	1	1	1	1	1	3	1	1	3	1	3	1	1	3	1	3	1	1	3	1	1	1	1	2	1	1	2	3	3	3	3	3
男	80	新农合	中度	是	2	58	1	1	2	1	2	3	3	3	1	1	2	1	1	1	1	1	1	1	3	3	1	3	2	1	3	1	2	2	1	1	1	1	1	1	2	1	2	2	3	3	3	3	3
男	69	新农合	轻度	否	2	48	1	2	1	1	2	2	2	3	2	1	1	2	2	1	2	1	2	1	1	2	1	2	2	1	1	2	2	2	1	2	1	1	1	1	2	1	1	1	3	3	3	3	3
女	77	城镇医保	轻度	是	2	60	1	1	2	1	2	2	3	4	1	1	1	2	2	1	1	1	1	1	2	1	1	3	1	1	2	2	3	2	2	2	1	1	1	1	2	4	1	1	2	2	2	2	2
男	60	新农合	轻度	是	2	56	1	1	1	1	1	2	3	3	1	1	1	1	1	1	1	1	2	2	2	1	1	3	2	1	3	4	1	3	1	1	1	1	1	1	3	3	1	2	1	4	1	3	1
男	54	城镇医保	轻度	否	1	37	1	2	1	1	2	2	2	2	2	2	1	1	1	1	1	2	3	1	2	2	1	3	1	1	3	1	1	1	2	2	1	1	1	1	2	1	2	3	1	1	3	2	3
女	50	城镇医保	轻度	否	2	21	2	4	2	2	2	2	1	1	1	1	1	1	1	1	1	1	1	1	2	3	2	2	2	2	2	2	2	2	2	2	4	3	3	4	3	1	1	1	3	3	3	3	3
女	68	城镇医保	轻度	否	2	42	1	2	1	1	3	2	2	3	1	2	2	2	2	1	2	2	1	2	2	3	2	3	1	1	1	1	1	1	1	1	4	3	3	4	1	4	1	1	3	3	3	3	3
女	63	城镇医保	中度	是	2	44	1	2	1	1	3	2	2	3	1	1	1	1	1	1	1	1	1	1	2	3	2	3	2	2	2	2	2	2	2	2	5	2	2	5	2	4	1	2	3	2	3	2	1
女	73	城镇医保	中度	是	2	49	1	2	1	1	3	3	3	3	1	1	1	1	1	1	1	1	1	1	1	4	3	1	1	3	2	3	3	1	1	3	5	2	2	5	2	4	1	2	3	2	2	3	1
女	81	城镇医保	轻度	是	1	75	1	2	3	2	1	1	2	2	1	1	1	1	1	1	1	1	2	1	3	3	1	3	1	1	2	3	2	2	2	2	4	3	3	4	2	2	1	2	2	2	3	3	2
男	84	自费	轻度	否	1	38	2	2	1	2	3	1	1	2	1	1	1	1	1	1	1	2	4	2	4	4	2	3	1	1	1	1	1	1	1	1	4	3	3	4	2	4	1	2	1	4	1	2	1
男	88	新农合	中度	是	2	54	1	2	3	2	3	3	1	3	1	1	1	1	1	1	1	1	1	1	2	3	2	3	2	2	2	2	2	2	2	2	3	3	4	4	3	1	3	2	2	2	2	2	2
女	71	城镇医保	轻度	是	1	73	1	1	3	2	1	2	4	2	2	2	2	2	2	2	2	2	2	2	2	2	2	2	1	1	1	1	1	1	1	1	5	4	3	1	2	3	2	1	1	4	1	4	2
男	84	自费	轻度	否	1	47	1	2	1	2	2	3	2	3	2	1	2	2	1	1	1	2	3	2	1	2	2	2	1	1	1	2	2	2	1	2	2	3	5	3	2	2	1	2	4	3	3	3	3
男	84	自费	轻度	否	2	42	1	2	2	2	3	3	2	3	1	1	1	1	2	2	1	2	1	2	2	2	1	2	2	2	2	2	2	2	2	1	2	2	4	5	4	4	3	4	4	4	4	4	4
男	84	自费	轻度	否	2	22	2	3	2	2	3	1	1	3	1	1	1	2	1	1	2	2	3	2	2	3	2	1	1	1	2	2	3	1	1	1	3	3	4	3	3	4	4	4	4	4	4	4	4
女	70	城镇医保	重度	否	1	73	1	1	3	2	1	4	4	3	2	2	2	2	2	2	2	1	3	2	1	3	1	2	1	1	2	2	1	1	1	1	3	3	3	4	3	4	2	3	4	4	4	3	3
男	80	新农合	轻度	是	2	74	1	1	3	2	1	2	4	3	1	1	1	1	1	1	1	1	1	1	3	3	1	3	1	1	3	3	2	3	1	3	3	3	3	4	2	4	4	4	4	4	4	4	4
女	70	城镇医保	轻度	是	1	71	1	1	2	1	1	4	4	2	2	2	1	1	1	2	1	1	1	2	2	1	2	1	2	1	2	3	2	2	2	3	3	3	3	4	4	4	4	4	3	4	4	4	4
女	21	新农合	可疑	否	2	45	1	2	1	2	2	1	1	4	2	1	2	1	1	1	1	1	2	2	3	4	1	3	2	1	3	1	2	1	1	2	3	3	3	4	4	4	3	4	4	4	4	4	4
男	72	城镇医保	轻度	是	1	51	1	4	1	1	2	2	1	4	1	1	1	1	1	1	1	2	2	1	3	3	1	3	2	1	3	3	2	1	1	3	2	4	4	3	4	4	4	4	4	4	4	4	3
男	93	城镇医保	中度	是	2	64	3	2	3	1	2	4	3	4	2	2	2	2	1	2	2	2	2	2	1	1	1	2	2	2	1	2	2	2	1	2	2	1	1	1	3	4	3	4	3	1	4	3	4
女	89	城镇医保	轻度	否	2	50	1	2	2	2	2	1	3	4	2	2	1	2	2	1	3	2	1	2	3	3	3	2	1	1	2	1	1	1	1	1	1	1	1	2	3	4	4	4	4	4	3	4	4
女	88	城镇医保	中度	是	2	32	2	4	1	1	3	2	1	4	2	2	2	2	2	2	2	2	2	2	2	2	2	2	2	1	1	1	1	2	1	2	1	1	1	2	3	4	3	3	4	4	3	4	3
女	87	城镇医保	中度	是	2	33	2	4	1	1	3	1	1	4	2	1	1	1	1	1	1	1	2	2	2	3	2	3	2	2	2	2	2	2	2	2	1	1	1	2	4	3	4	3	4	4	3	4	4
男	65	城镇医保	轻度	是	1	48	1	2	1	2	2	2	1	4	2	1	2	2	2	2	2	2	2	2	1	2	2	2	1	2	1	2	2	2	2	1	1	2	1	1	4	3	4	4	4	1	3	3	3
女	78	城镇医保	重度	否	2	52	1	1	1	1	2	4	2	4	1	1	1	1	1	1	1	1	3	2	3	3	2	3	2	1	2	2	2	2	2	2	1	1	1	2	3	4	4	4	3	1	4	3	4
男	75	自费	轻度	是	1	46	1	2	1	1	2	4	2	4	1	1	1	1	3	1	1	1	3	1	2	4	2	2	1	1	3	3	3	1	1	2	1	1	1	2	3	4	4	3	4	1	4	4	3
女	73	自费	中度	是	1	51	1	3	1	1	2	2	2	4	2	2	2	2	2	2	1	1	3	2	3	3	1	3	1	2	2	1	1	1	1	1	1	1	1	2	3	4	4	3	3	3	4	4	3
男	75	城镇医保	中度	是	2	73	1	4	3	1	1	2	3	4	2	1	1	1	2	2	1	1	3	2	3	3	2	1	1	2	1	2	3	2	1	2	1	1	1	2	4	3	3	3	4	3	3	4	3
女	72	城镇医保	中度	否	2	49	1	1	1	1	3	2	2	2	1	1	1	1	1	1	1	1	3	1	2	3	2	2	2	3	3	2	3	2	2	2	1	1	1	2	4	3	3	3	3	4	3	3	4
女	73	新农合	重度	是	1	42	1	3	1	2	2	4	2	3	1	1	1	3	3	2	1	1	3	1	3	4	2	3	1	1	2	2	2	1	1	1	1	1	1	2	3	4	4	3	4	3	4	3	3
女	90	新农合	中度	否	2	56	1	4	3	2	2	1	2	4	1	1	1	3	1	1	1	1	1	1	1	3	2	3	2	2	3	2	3	2	3	2	1	1	1	2	3	3	3	4	3	4	4	3	4
男	82	城镇医保	轻度	是	2	20	2	4	2	1	3	1	1	3	1	1	1	3	1	1	2	1	3	2	3	4	2	3	1	1	3	1	3	1	1	1	1	1	1	2	4	4	3	3	4	3	4	3	3
女	80	城镇医保	轻度	否	1	80	1	1	2	2	2	1	1	1	2	1	2	2	2	1	1	2	1	2	2	1	2	3	2	2	1	3	3	2	2	1	1	1	1	2	3	4	4	4	4	4	4	4	4
男	80	城镇医保	中度	是	2	50	1	1	2	2	2	2	1	1	2	2	2	2	1	1	1	2	2	2	2	2	2	2	2	2	2	2	2	2	2	2	1	1	1	2	3	4	3	4	4	3	4	3	1
男	87	新农合	可疑	是	1	40	1	2	2	1	2	2	2	2	1	1	1	1	2	2	1	2	3	2	4	3	2	3	2	2	2	1	2	1	2	1	4	1	4	4	4	4	4	4	4	4	4	4	3
男	82	自费	轻度	是	1	38	1	2	2	2	2	1	1	1	3	3	3	3	3	3	1	1	1	1	1	1	1	1	1	1	2	3	2	2	2	2	4	2	3	4	3	4	3	3	4	4	4	4	4
女	69	新农合	可疑	是	1	46	1	2	1	2	2	3	1	4	1	3	1	3	1	1	1	2	3	2	2	1	1	3	3	1	3	1	3	1	3	1	4	2	2	5	3	4	4	4	4	1	4	4	4
男	68	城镇医保	中度	否	2	49	1	1	2	1	3	2	3	3	1	1	2	2	2	1	1	2	3	2	3	2	2	2	1	2	2	2	2	2	2	2	4	1	4	4	3	3	4	4	3	3	3	3	4
女	71	城镇医保	重度	是	2	50	1	1	1	1	2	2	2	4	3	3	3	3	3	3	1	1	1	1	1	1	1	1	1	1	2	3	2	2	2	2	2	5	2	4	3	4	3	3	4	1	4	3	3
女	92	城镇医保	重度	否	2	43	1	3	1	1	3	4	2	3	1	3	1	3	1	1	1	2	3	2	2	1	1	3	3	1	3	1	3	1	3	1	3	3	3	4	4	4	4	3	3	1	4	3	4
女	89	自费	中度	是	2	53	1	1	2	2	2	4	3	3	1	1	1	1	1	1	1	1	3	1	3	3	2	3	2	2	2	3	2	2	2	3	4	1	2	5	3	4	4	4	3	3	4	3	3
男	65	城镇医保	轻度	否	2	45	1	1	2	1	2	2	3	2	2	2	2	2	1	1	1	2	2	2	2	2	2	2	2	2	2	2	2	2	2	2	4	2	2	4	4	3	3	3	3	3	4	4	4
男	73	城镇医保	轻度	是	2	73	1	1	2	1	1	4	4	3	2	2	2	2	2	1	1	2	1	2	2	3	2	2	1	2	2	2	3	2	2	2	2	2	4	4	3	3	4	3	3	3	3	4	3
男	77	城镇医保	中度	是	2	75	1	1	1	1	1	3	3	2	1	1	2	2	2	2	2	2	2	2	2	2	2	2	2	2	2	2	2	2	2	2	4	1	2	5	4	4	3	3	3	3	4	3	3
男	73	新农合	轻度	是	2	43	1	1	1	2	3	2	1	3	2	2	1	1	1	1	1	1	3	2	3	3	2	3	2	2	2	2	2	2	2	2	5	2	4	1	3	4	2	2	4	4	4	4	4
男	86	城镇医保	轻度	是	2	39	1	2	1	1	2	2	1	3	1	1	1	1	1	1	1	3	3	3	3	3	2	2	1	3	2	2	4	2	1	1	2	1	5	4	3	4	4	4	4	4	4	4	4
男	55	城镇医保	可疑	否	2	47	1	1	1	1	1	1	1	2	1	1	1	2	1	1	1	3	3	3	4	3	2	2	1	2	2	2	4	1	1	1	3	2	3	4	3	4	3	2	4	4	4	4	3
男	82	城镇医保	轻度	是	2	51	1	1	2	1	2	4	3	3	4	2	2	2	2	2	1	1	2	2	1	3	2	2	1	1	3	2	1	2	3	1	2	2	4	4	3	4	4	3	4	3	3	3	4
男	81	城镇医保	轻度	是	1	49	1	2	1	1	2	2	2	3	2	1	2	2	2	2	2	2	2	2	2	2	2	2	2	2	2	2	2	2	2	2	3	3	3	3	3	3	4	3	4	4	3	3	3
女	43	城镇医保	中度	否	2	32	1	1	2	1	3	1	1	3	1	2	2	2	1	1	1	2	3	1	3	4	2	3	1	1	2	2	2	2	2	3	3	3	3	3	3	4	4	4	3	1	3	4	3
女	73	城镇医保	中度	是	1	40	1	4	1	1	2	2	3	4	2	2	2	2	2	2	2	2	3	2	2	2	2	2	2	2	3	1	3	1	1	1	3	3	3	3	3	4	3	3	4	1	3	3	4
男	82	城镇医保	轻度	是	2	73	1	1	3	1	1	1	2	3	2	2	2	2	2	2	2	2	3	2	2	3	2	2	1	2	1	1	2	2	2	2	3	3	3	3	4	4	4	4	4	4	4	4	4
男	74	城镇医保	轻度	是	2	50	1	2	1	1	2	1	1	2	2	2	2	3	2	2	1	2	3	3	3	3	3	1	1	2	1	2	2	1	1	1	4	2	2	4	3	4	2	3	4	4	4	3	3
男	68	自费	正常	否	2	62	1	2	1	1	1	3	2	3	1	1	1	2	2	1	1	2	3	2	3	3	2	3	2	2	2	2	3	2	1	2	3	3	3	3	3	4	4	3	4	4	4	4	4
女	65	城镇医保	可疑	否	2	30	1	4	1	1	2	1	1	4	1	1	1	3	2	2	2	2	3	3	4	2	2	4	1	2	1	1	1	1	2	2	2	2	5	3	2	4	4	3	4	4	4	4	4
男	86	新农合	中度	是	2	49	1	2	1	1	2	3	1	3	2	2	2	3	1	1	3	2	2	3	3	2	2	2	2	2	2	2	2	1	1	1	1	2	5	4	3	4	4	3	4	3	4	3	3
男	80	新农合	轻度	是	1	53	1	4	3	2	2	4	4	4	2	2	2	2	2	2	2	2	2	2	2	2	2	2	2	2	2	2	2	2	2	2	2	2	4	4	2	4	3	3	4	4	4	4	4
男	87	自费	中度	是	2	63	1	1	3	2	3	4	3	3	2	2	2	2	2	2	2	2	2	2	2	2	2	2	2	2	2	2	2	2	2	2	2	2	4	4	2	4	4	3	4	4	4	3	3
女	93	自费	中度	否	1	60	1	2	1	2	2	4	2	3	2	2	2	2	2	2	2	2	2	2	2	2	2	2	2	2	2	2	2	2	2	2	2	3	3	4	4	4	3	3	4	4	4	4	3
男	68	新农合	轻度	否	2	54	1	1	2	1	2	2	3	2	2	2	2	2	2	2	2	2	2	2	2	2	2	2	2	2	2	2	2	2	2	2	4	3	2	3	3	4	4	4	4	4	4	4	3
男	84	自费	轻度	否	2	30	2	3	1	2	3	1	1	2	2	2	2	2	2	2	2	2	2	2	2	2	2	2	2	2	2	2	2	2	2	2	2	2	4	4	4	4	3	2	4	4	4	3	3
女	90	新农合	中度	是	2	66	1	1	2	2	2	3	4	2	2	2	2	2	2	2	2	2	2	2	2	2	2	2	2	2	2	2	2	2	2	2	3	3	2	4	2	4	4	4	4	1	4	4	3
女	91	城镇医保	重度	是	2	35	2	4	1	1	3	2	4	2	2	2	2	2	2	2	2	2	2	2	2	2	2	2	2	2	2	2	2	2	2	2	2	2	4	4	4	4	3	2	4	4	3	4	3
男	66	城镇医保	轻度	是	1	40	1	1	2	2	2	2	1	3	2	2	2	2	2	2	2	2	2	2	2	2	2	2	2	2	2	2	2	2	2	2	3	2	3	4	4	3	4	3	3	4	3	3	4
男	79	自费	轻度	是	2	55	3	4	1	2	2	3	2	4	2	2	1	2	1	2	2	2	3	2	2	3	2	2	2	2	2	2	2	2	2	2	3	2	4	3	4	3	3	4	4	1	3	3	3
女	75	自费	轻度	是	1	78	1	2	3	1	1	1	4	3	2	2	2	2	2	2	2	2	2	2	2	2	2	2	2	2	2	2	2	2	2	2	3	2	3	4	4	4	4	4	4	4	4	4	4
男	88	城镇医保	中度	是	2	55	1	4	1	1	3	2	1	3	2	2	2	2	2	2	2	2	2	2	2	2	2	2	2	2	2	2	2	2	2	2	3	2	3	4	2	4	3	3	4	3	4	4	4
女	72	新农合	轻度	是	2	46	1	2	1	1	2	3	2	3	2	2	2	2	2	2	2	2	2	2	2	2	2	2	2	2	2	2	2	2	2	2	3	3	3	3	3	4	4	4	4	4	4	3	3
女	28	城镇医保	中度	否	2	28	1	2	3	2	1	4	2	2	2	2	2	2	2	2	2	2	2	2	2	2	2	2	2	2	2	2	2	2	2	2	3	3	2	4	3	4	1	4	4	3	4	4	3
男	83	城镇医保	轻度	是	1	74	1	3	3	1	1	3	4	2	2	2	2	2	2	2	2	2	2	2	2	2	2	2	2	2	2	2	2	2	2	2	3	3	2	4	3	4	4	4	4	4	4	4	3
男	92	新农合	中度	否	2	68	1	2	2	2	2	2	4	2	2	2	2	2	2	2	2	2	2	2	2	2	2	2	2	2	2	2	2	2	2	2	3	2	3	4	4	4	2	2	4	4	4	4	3
女	81	城镇医保	轻度	是	1	85	1	3	3	1	1	4	4	2	2	2	2	2	2	2	2	2	2	2	2	2	2	2	2	2	2	2	2	2	2	2	4	2	2	4	4	4	3	3	4	4	4	3	3
女	70	城镇医保	轻度	是	2	45	1	4	1	1	2	2	1	3	2	2	2	2	2	2	2	2	2	2	2	2	2	2	2	2	2	2	2	2	2	2	3	2	4	3	3	4	3	3	4	1	3	3	3
男	70	城镇医保	轻度	否	2	70	1	3	3	2	1	4	3	2	2	2	2	2	2	2	2	2	2	2	2	2	2	2	2	2	2	2	2	2	2	2	4	2	4	2	3	3	3	3	3	3	3	3	4
女	76	城镇医保	轻度	是	1	83	1	3	3	1	1	4	4	2	2	2	2	2	2	2	2	2	2	2	2	2	2	2	2	2	2	2	2	2	2	2	3	3	3	3	1	4	3	3	4	4	4	4	4
男	72	城镇医保	重度	否	1	42	1	2	1	1	2	2	1	4	2	2	2	2	2	2	2	2	2	2	2	2	2	2	2	2	2	2	2	2	2	2	4	3	3	2	2	3	4	4	4	4	4	4	4
男	89	新农合	中度	是	2	55	1	2	3	2	3	3	1	3	2	2	2	2	2	2	2	2	2	2	2	2	2	2	2	2	2	2	2	2	2	2	3	3	2	4	4	4	4	3	4	4	3	3	4
女	72	城镇医保	轻度	是	1	74	1	1	3	2	1	2	4	2	2	2	2	2	2	2	2	2	2	2	2	2	2	2	2	2	2	2	2	2	2	2	2	2	4	4	2	4	3	3	4	4	4	4	3
女	71	城镇医保	重度	否	1	74	1	1	3	2	1	4	4	3	2	2	2	2	2	2	2	2	2	2	2	2	2	2	2	2	2	2	2	2	2	2	3	3	4	2	4	4	4	3	4	3	4	3	3
男	81	新农合	轻度	是	2	75	1	1	3	2	1	2	3	3	2	2	2	2	2	2	2	2	2	2	2	2	2	2	2	2	2	2	2	2	2	2	2	2	3	4	3	4	4	3	4	4	4	4	4
女	91	新农合	中度	否	2	57	1	4	3	2	2	1	2	3	2	2	2	2	2	2	2	2	2	2	2	2	2	2	2	2	2	2	2	2	2	2	3	2	2	4	2	4	3	3	4	4	4	4	4
女	68	城镇医保	中度	是	2	42	1	4	1	1	2	3	1	3	1	2	2	2	1	2	1	1	2	3	3	3	1	2	1	2	1	2	4	2	2	4	3	2	2	4	2	4	3	3	4	4	4	3	3
女	50	城镇医保	轻度	否	2	30	1	3	1	1	1	2	3	3	2	2	2	1	2	2	1	1	3	2	1	3	2	3	1	2	2	3	3	2	2	2	3	2	2	4	2	4	2	1	4	4	4	4	4
女	78	城镇医保	正常	否	2	70	1	2	1	1	1	2	3	3	2	2	2	2	2	2	2	2	2	2	2	2	2	2	2	2	3	2	2	2	2	2	1	1	1	2	3	4	3	2	4	4	4	3	2
女	78	城镇医保	正常	否	1	70	1	2	1	1	1	3	3	3	2	1	1	1	2	2	2	2	3	2	2	3	2	3	2	2	2	2	3	2	2	2	1	1	1	2	3	4	2	1	4	4	4	4	3
女	77	新农合	轻度	是	2	48	1	1	1	2	3	1	1	2	1	1	1	1	1	1	1	2	3	3	3	3	3	3	2	2	3	2	3	2	2	2	1	1	2	1	3	4	2	2	4	4	4	4	4
男	88	城镇医保	中度	否	2	51	1	3	1	1	2	3	1	4	2	2	2	2	2	2	2	2	2	2	2	3	2	3	2	2	2	2	2	1	2	2	1	1	1	2	4	3	4	4	3	1	3	3	4
女	75	自费	轻度	是	2	50	1	2	1	1	2	1	2	3	2	2	2	2	2	2	2	2	3	2	2	2	2	3	2	1	3	1	3	2	2	1	1	1	2	1	3	4	3	3	3	1	3	3	4
男	70	新农合	可疑	否	1	45	1	2	1	2	2	2	1	3	1	1	1	1	2	2	1	2	4	2	3	3	2	3	2	2	2	2	3	2	2	2	1	1	1	2	4	4	4	3	3	1	3	4	3
女	81	城镇医保	中度	是	2	55	1	1	2	1	3	3	2	3	3	2	2	2	2	2	2	2	2	2	2	2	2	2	2	2	2	2	2	2	2	2	1	1	1	2	1	4	4	2	4	4	4	4	4
女	60	新农合	正常	是	2	45	1	1	1	2	2	2	2	3	2	2	2	2	2	2	2	2	2	2	2	3	2	2	2	2	2	2	2	2	2	2	1	1	2	2	3	4	3	3	4	3	4	4	3
女	63	新农合	轻度	是	2	46	1	1	2	2	1	4	3	3	2	2	2	2	2	2	2	2	2	2	2	3	2	2	2	2	2	2	2	2	2	2	2	1	2	1	3	1	4	3	4	4	4	4	4
女	72	城镇医保	中度	是	2	35	1	2	2	1	2	4	2	4	1	1	1	2	1	2	2	3	3	2	3	2	2	2	3	3	2	3	2	2	1	2	1	1	3	1	3	4	4	1	4	4	3	4	4
女	75	新农合	中度	否	2	55	1	1	1	2	2	2	2	3	1	4	1	4	2	2	1	1	2	1	3	2	2	3	1	1	3	2	3	3	1	2	1	1	2	2	3	4	3	1	3	4	4	4	3
女	76	城镇医保	中度	否	2	26	2	4	1	1	2	2	1	3	1	1	2	2	1	1	1	1	3	3	3	3	2	3	2	2	3	3	2	2	2	2	2	2	1	1	3	4	3	4	3	1	3	3	4
女	76	城镇医保	中度	否	2	50	1	3	1	1	2	2	1	3	2	2	1	2	3	2	2	1	3	1	1	3	4	3	1	2	3	2	2	3	1	1	2	3	2	4	3	4	3	3	1	4	1	3	4
女	87	城镇医保	重度	否	2	26	2	4	1	1	3	4	3	3	2	2	2	2	2	2	2	2	2	2	2	3	2	3	2	2	2	2	2	2	2	2	3	2	2	4	2	4	2	2	4	4	4	3	3
女	55	新农合	中度	是	1	58	1	1	2	2	1	4	3	1	2	2	1	1	1	1	1	1	4	1	3	4	3	3	2	2	3	3	2	2	2	2	3	3	2	3	2	4	4	2	4	4	4	4	4
女	87	城镇医保	重度	否	2	54	1	4	3	1	2	4	3	3	2	1	1	3	3	3	2	2	3	2	3	4	2	2	1	2	1	3	2	1	1	2	2	2	3	4	3	4	3	2	3	4	2	4	3
女	77	城镇医保	中度	是	2	29	2	4	1	1	3	3	2	4	1	1	1	2	2	2	2	2	3	2	3	3	3	3	2	2	2	2	2	2	2	2	3	3	2	3	3	4	1	3	4	4	4	4	4
女	77	城镇医保	中度	是	2	54	1	4	3	1	2	3	3	4	2	2	2	2	2	2	2	2	3	2	2	3	2	3	1	1	2	2	3	2	2	2	3	2	2	4	2	4	4	3	4	4	4	4	4
男	70	城镇医保	轻度	是	2	68	1	3	1	1	1	3	3	3	2	2	2	2	2	2	2	2	2	2	2	3	2	3	2	2	2	2	2	2	2	2	2	5	2	2	3	4	3	3	4	4	4	4	4
女	79	城镇医保	正常	否	1	77	1	2	3	1	1	4	2	4	2	2	2	2	2	2	2	2	2	2	2	2	3	3	2	2	2	2	2	2	2	2	2	2	2	5	3	4	4	3	3	4	4	4	4
女	67	自费	可疑	否	2	49	1	2	1	2	2	1	1	3	1	2	1	1	1	2	2	2	4	2	3	3	3	3	2	1	3	2	2	2	2	2	1	4	1	5	2	4	1	2	4	4	4	4	4
女	74	城镇医保	正常	是	2	50	1	1	1	2	2	1	1	3	2	2	2	2	2	2	2	2	3	2	2	3	2	2	2	2	2	2	2	2	2	2	4	1	4	2	2	4	1	3	4	4	1	4	1
男	76	城镇医保	可疑	是	2	45	1	2	1	2	2	2	1	4	3	2	1	3	2	2	2	2	3	2	3	3	3	3	2	1	2	1	2	1	2	1	4	4	2	1	3	4	3	3	4	3	4	3	2
男	60	新农合	中度	是	2	56	1	1	2	2	1	2	3	3	2	2	2	2	2	2	2	2	3	2	2	3	2	2	2	2	2	2	2	2	2	2	2	2	2	5	2	4	2	2	4	4	4	4	2
女	74	城镇医保	正常	是	1	45	1	3	1	2	2	4	1	4	2	2	3	2	2	2	2	2	3	2	2	2	2	2	2	2	2	2	2	2	2	2	2	2	2	5	4	4	2	2	4	4	4	4	2
男	82	新农合	可疑	是	2	73	1	1	3	2	1	4	2	1	2	2	2	2	2	2	2	2	2	2	2	3	2	3	2	2	2	2	2	2	2	2	2	2	5	2	4	4	2	2	4	4	4	4	4
女	67	城镇医保	正常	否	1	47	1	2	1	1	2	4	4	2	2	1	1	1	2	2	2	2	2	2	3	3	2	2	1	2	3	2	4	3	3	1	2	5	2	2	3	4	2	2	4	3	4	4	1
女	90	城镇医保	中度	否	1	52	1	2	1	1	2	2	2	3	2	2	2	2	2	2	2	2	2	3	2	3	2	3	1	2	2	1	3	2	2	2	1	4	4	2	2	4	2	2	4	4	3	3	3
女	78	新农合	中度	是	2	41	1	2	1	2	2	3	2	3	1	1	1	3	3	3	1	1	3	3	2	2	2	2	1	2	2	1	3	3	3	3	2	2	2	5	2	4	2	2	4	3	4	2	3
女	80	城镇医保	轻度	是	2	43	1	3	1	1	2	3	1	3	3	3	1	2	2	2	2	1	1	3	1	2	3	3	1	2	2	4	2	2	1	3	2	3	1	5	2	4	2	2	4	4	4	2	2
男	75	城镇医保	轻度	是	2	75	1	2	3	1	1	3	3	2	3	1	1	3	1	2	1	2	3	2	1	4	4	2	1	2	3	3	1	2	1	3	3	3	2	3	3	4	3	3	3	3	3	3	3
男	82	城镇医保	轻度	是	2	47	1	3	1	1	2	4	2	3	2	2	2	2	2	2	2	2	3	2	2	2	2	3	2	2	3	2	2	2	2	2	3	2	2	4	1	4	3	2	4	4	4	4	4
女	65	城镇医保	中度	否	2	32	1	4	1	1	2	1	2	4	2	2	2	2	2	2	2	2	3	3	3	3	2	2	1	2	2	2	2	2	2	2	3	2	2	4	2	4	1	3	4	4	4	4	2
男	78	城镇医保	重度	否	1	40	1	3	1	1	2	4	2	3	2	2	2	3	2	2	2	2	2	2	3	3	2	2	2	2	2	2	2	2	2	2	2	2	4	3	2	4	2	2	4	4	4	4	4
男	87	城镇医保	重度	是	2	46	1	2	1	1	2	4	3	3	2	2	2	1	2	2	1	1	2	2	2	2	3	3	2	3	2	3	3	2	3	2	2	2	2	4	3	4	3	3	4	4	4	4	3
女	61	新农合	可疑	是	2	36	1	3	1	1	3	1	1	2	2	2	2	2	2	2	2	2	3	2	2	3	2	3	2	2	2	2	2	2	2	2	2	2	2	4	3	2	1	2	4	4	4	4	4
女	80	新农合	轻度	否	2	50	1	2	2	2	2	1	1	2	1	1	1	2	1	2	1	1	3	4	4	4	1	4	1	1	4	4	3	2	1	1	2	2	2	4	4	4	3	1	4	3	4	3	2
女	80	新农合	轻度	否	2	50	1	2	2	2	2	1	1	2	1	1	1	1	3	2	2	2	3	3	3	3	2	2	2	3	3	2	2	2	2	2	2	2	2	4	3	4	2	2	4	4	4	4	2
女	80	新农合	轻度	否	2	50	1	2	2	2	2	1	1	2	1	1	1	2	2	1	1	1	1	3	2	4	2	3	2	3	3	2	3	4	2	3	2	2	2	4	3	4	3	2	4	4	4	3	2
女	90	城镇医保	轻度	否	1	20	2	2	2	1	3	1	1	4	2	2	2	2	2	2	2	2	3	2	3	3	2	2	2	2	2	2	2	2	2	2	2	2	2	4	2	4	2	2	4	4	4	3	3
男	74	新农合	轻度	否	1	48	1	2	1	1	3	1	1	4	2	2	2	2	2	2	2	2	3	2	3	3	2	2	1	2	3	2	2	2	2	2	2	2	2	4	3	4	2	4	3	3	4	3	3
男	71	城镇医保	可疑	否	2	43	1	2	2	1	3	1	2	4	1	1	1	1	3	3	1	3	4	1	3	4	1	3	1	1	3	3	2	2	2	3	2	2	2	4	3	4	1	2	4	4	4	4	1
男	72	城镇医保	重度	否	1	42	1	2	1	1	2	2	1	4	2	2	2	2	2	2	2	2	2	2	2	2	2	3	2	2	3	2	3	2	2	2	2	2	2	4	3	4	4	4	4	4	4	3	3
女	65	城镇医保	轻度	是	2	60	1	2	2	2	3	2	3	3	1	1	1	1	1	2	1	2	4	1	4	4	1	3	3	2	4	3	2	2	1	3	1	1	4	4	2	4	3	3	4	4	1	3	3
男	90	城镇医保	轻度	是	1	39	1	2	1	1	3	1	1	3	2	2	2	2	2	2	2	2	2	2	3	3	4	4	2	2	1	1	2	1	1	3	2	3	2	3	2	4	4	3	4	4	4	4	4
女	67	城镇医保	可疑	是	2	33	1	1	1	2	2	2	1	2	1	1	1	2	2	2	1	1	2	2	3	3	2	3	2	2	4	3	3	2	2	3	2	2	2	4	3	4	2	2	4	4	4	4	3
男	65	城镇医保	可疑	否	2	57	1	1	2	2	1	4	4	3	1	1	1	1	1	1	1	1	3	3	2	2	2	3	2	2	3	3	4	4	3	3	2	2	2	4	3	4	3	3	4	4	4	4	3
男	70	城镇医保	轻度	否	1	57	1	2	1	1	3	3	3	4	2	3	1	3	1	1	1	2	4	3	4	3	3	2	1	1	1	1	3	2	3	2	2	2	2	4	2	4	2	2	4	4	4	4	4
男	65	城镇医保	可疑	否	2	30	1	3	1	2	2	1	2	3	2	3	1	3	3	2	2	2	1	3	2	2	4	3	1	1	4	1	3	1	1	2	2	2	3	3	3	4	2	1	4	3	4	3	3
女	91	城镇医保	轻度	是	1	21	2	4	2	1	3	2	1	2	2	2	2	2	2	2	2	2	3	2	3	3	2	2	2	2	3	2	2	2	2	2	2	3	2	3	2	4	1	1	4	4	4	4	4
女	73	城镇医保	轻度	否	2	49	1	2	1	2	2	2	2	4	2	2	2	2	2	2	2	2	2	2	2	4	2	2	2	3	2	3	2	2	2	2	2	2	2	4	2	3	2	1	4	4	4	4	4
女	90	新农合	中度	是	2	45	1	2	1	1	2	2	2	2	2	1	2	2	2	2	2	3	3	3	3	3	2	3	2	2	3	1	2	2	2	1	2	3	3	2	3	4	2	3	4	3	3	3	3
女	81	城镇医保	中度	是	2	56	1	2	1	1	3	2	3	4	2	2	2	2	2	2	2	2	3	2	3	3	2	3	2	2	2	2	2	2	2	2	1	2	3	4	3	4	2	2	4	1	4	3	2
女	84	城镇医保	轻度	是	1	57	1	3	1	1	2	2	2	4	2	2	2	2	2	2	2	2	2	2	2	3	2	3	2	2	3	2	3	2	2	2	2	2	3	3	3	4	2	1	4	1	4	3	2
男	78	城镇医保	中度	是	2	48	3	3	2	1	2	2	3	3	2	2	2	2	2	2	2	2	3	2	2	3	2	3	2	2	2	2	3	2	2	2	2	2	3	3	3	4	2	2	3	4	4	4	3
男	68	城镇医保	轻度	是	2	52	1	1	1	2	2	2	2	3	2	2	2	2	3	2	1	1	4	2	3	3	2	3	2	2	2	2	2	2	2	2	2	2	2	4	3	4	2	4	4	4	4	4	2
女	76	新农合	中度	是	2	47	1	2	1	1	2	3	2	4	2	2	2	2	2	2	2	2	3	2	3	3	2	3	2	2	2	2	2	2	2	2	2	2	2	4	4	4	1	2	4	4	4	3	3
男	80	城镇医保	中度	是	1	55	1	2	3	1	2	3	3	3	2	2	2	2	2	2	2	2	3	2	2	3	2	3	2	2	2	2	3	2	2	2	2	2	2	4	2	4	2	3	4	4	4	4	4
女	86	自费	可疑	是	2	63	1	1	3	2	2	4	2	2	2	2	2	1	2	2	2	2	4	3	3	3	2	2	2	2	2	2	2	2	2	2	2	2	2	4	3	4	3	3	4	4	4	4	3
女	92	新农合	中度	是	2	68	1	2	3	2	3	4	2	2	2	1	1	2	1	2	2	2	3	1	3	3	2	3	4	2	3	4	3	1	1	2	2	2	2	4	3	4	1	2	4	4	4	4	4
女	70	新农合	中度	是	2	48	1	1	2	2	2	2	3	1	1	1	1	2	2	2	3	2	3	2	3	3	2	3	2	3	2	1	2	2	4	2	3	2	2	3	1	4	2	2	4	4	4	4	4
男	70	自费	中度	是	1	49	1	1	1	2	2	2	2	2	2	4	1	1	1	2	2	4	2	1	2	2	4	2	3	1	4	2	1	2	3	2	3	2	2	3	2	4	3	2	4	1	3	3	3
女	69	新农合	可疑	是	2	47	1	2	1	2	2	2	2	4	1	2	2	2	3	4	1	2	1	2	3	3	2	2	3	1	3	3	2	2	2	2	1	1	4	4	2	4	2	2	4	3	3	3	3
女	82	新农合	可疑	是	1	65	1	2	3	2	2	4	2	3	1	1	2	3	3	3	2	3	3	3	1	2	4	2	2	2	1	1	3	1	1	4	2	2	3	3	2	4	2	1	4	4	4	3	3
女	78	新农合	可疑	是	1	45	1	2	1	2	2	4	2	2	2	1	2	1	3	3	2	2	2	3	3	3	1	1	4	2	3	1	3	1	3	2	3	2	2	3	3	4	1	1	4	4	4	4	4
女	95	新农合	重度	是	2	50	1	1	1	1	3	2	1	2	2	2	2	2	2	2	2	3	3	3	3	3	2	2	2	2	2	2	2	2	2	2	2	2	2	4	3	4	2	2	4	4	4	4	3
女	62	城镇医保	正常	否	2	35	2	4	1	1	2	2	1	2	2	2	2	2	2	2	2	2	3	2	3	3	2	3	2	2	3	2	2	2	2	2	2	2	2	4	3	4	4	1	4	4	4	4	4
男	78	自费	轻度	是	1	40	1	1	1	2	2	2	1	2	2	2	2	2	2	2	2	2	3	2	3	3	2	3	2	2	2	3	2	2	2	2	3	2	2	3	3	4	2	2	4	4	4	4	4
男	89	自费	轻度	是	2	46	1	1	1	2	2	2	1	2	2	2	1	2	1	2	2	2	3	2	3	3	3	2	2	2	3	3	3	1	2	3	2	3	2	3	2	4	3	2	4	4	4	3	2
男	85	城镇医保	中度	是	2	51	1	2	1	2	2	3	2	3	2	2	2	2	2	2	3	2	3	2	2	4	2	3	2	2	2	1	3	2	2	2	3	2	2	3	3	4	3	2	4	4	4	3	2
男	62	自费	可疑	是	1	26	2	4	1	1	3	2	1	4	2	1	1	2	1	1	2	2	4	3	4	4	2	4	2	2	3	2	3	2	1	1	3	2	2	3	2	4	3	1	4	4	4	3	3
男	75	自费	正常	否	2	33	2	4	1	1	2	1	1	4	2	2	2	2	2	2	2	2	3	2	3	3	2	3	2	2	2	3	2	2	2	2	2	5	1	2	3	4	2	3	4	4	4	3	2
男	87	自费	可疑	否	2	38	2	2	1	1	2	3	2	3	2	2	2	2	2	2	2	2	2	2	3	3	2	3	2	2	2	2	3	3	2	2	5	1	2	2	3	4	2	3	4	3	4	3	2
女	68	城镇医保	中度	是	2	22	2	4	1	1	2	2	1	3	2	2	2	2	2	2	2	2	3	2	3	3	2	3	2	2	2	3	2	2	2	2	2	1	5	2	2	4	3	3	4	1	4	4	2
男	89	自费	轻度	是	1	45	1	1	1	2	2	2	1	1	2	2	2	2	1	1	1	1	1	2	4	4	1	4	2	3	3	3	3	1	3	3	3	2	2	3	2	4	2	2	3	4	4	3	3
男	89	自费	轻度	是	1	30	1	2	1	2	2	1	1	1	2	2	2	2	2	2	2	3	3	3	4	4	2	4	2	1	2	1	1	2	2	1	1	2	2	5	3	4	2	2	4	4	4	4	3
男	81	城镇医保	重度	是	2	78	1	1	3	2	1	2	4	3	2	2	2	2	2	2	2	2	2	2	3	3	2	3	2	2	3	3	2	2	2	2	2	2	5	1	2	4	2	2	3	1	4	3	3
男	72	自费	中度	是	2	40	1	2	1	1	1	3	3	4	2	2	2	2	2	2	2	2	2	3	3	2	2	3	2	2	3	2	3	2	2	2	5	2	1	2	2	4	1	3	4	4	4	4	4
女	78	城镇医保	中度	是	2	45	1	2	1	1	3	1	3	4	2	3	3	2	2	2	2	2	3	3	2	2	2	1	3	2	3	2	3	2	1	2	3	2	2	3	3	4	1	2	4	4	4	4	4
男	79	城镇医保	中度	是	1	51	1	2	1	1	2	3	3	4	2	2	2	2	2	2	2	2	2	2	2	3	2	2	2	2	3	2	4	3	2	2	2	2	3	3	3	4	1	2	4	4	4	4	4
女	83	城镇医保	中度	是	2	50	1	1	2	1	3	2	3	4	2	1	1	2	2	3	1	1	1	1	4	4	4	4	2	3	2	2	4	1	1	3	1	2	3	4	3	4	2	2	4	4	3	2	2
女	68	自费	轻度	是	2	47	1	1	1	2	2	4	3	3	2	2	2	2	2	2	2	2	3	2	3	3	2	2	2	3	3	2	2	2	2	2	2	2	3	3	4	4	4	4	1	1	4	4	4
男	68	城镇医保	中度	是	2	65	1	2	2	1	1	2	2	2	3	2	1	3	1	2	2	2	3	2	2	3	2	2	1	1	2	3	4	3	2	3	2	2	3	3	4	4	4	4	1	1	4	3	3
女	67	城镇医保	中度	是	2	40	1	2	2	1	2	2	2	4	2	2	2	2	2	2	2	2	3	2	3	3	3	3	2	2	2	2	2	2	2	2	2	2	3	3	2	4	3	3	4	4	4	3	3
女	70	城镇医保	可疑	是	1	50	1	2	1	1	2	2	2	3	1	1	1	2	3	1	1	1	3	3	3	3	3	3	2	2	3	3	3	3	2	2	2	2	2	3	3	4	1	3	4	4	4	4	4
女	88	新农合	轻度	是	2	23	2	4	2	2	3	1	1	4	2	2	1	3	2	2	2	3	4	3	2	2	1	2	1	2	3	2	4	2	2	2	2	2	2	3	2	2	2	3	4	3	4	4	3
男	67	城镇医保	中度	是	1	36	1	3	1	1	2	3	3	4	1	3	1	4	1	4	1	2	3	2	3	2	2	4	2	2	1	1	3	3	2	2	2	2	2	3	1	4	2	2	4	4	4	3	3
男	70	新农合	轻度	是	2	65	1	2	3	2	1	2	2	3	2	3	1	1	2	3	2	1	2	3	4	3	4	2	2	1	2	2	3	1	2	3	2	2	2	3	1	4	3	2	4	4	4	4	4
女	75	新农合	轻度	是	1	40	1	2	2	2	2	1	1	2	1	2	2	3	4	2	1	2	2	2	3	4	2	2	1	1	4	2	3	3	1	2	2	2	2	3	4	4	4	4	1	1	4	4	4
女	67	新农合	可疑	是	1	35	2	3	1	2	2	1	1	1	1	1	2	2	1	4	2	2	3	1	3	3	2	3	3	3	2	1	3	2	2	3	1	2	2	4	4	4	4	4	1	1	4	3	3
男	65	城镇医保	轻度	否	1	43	1	2	2	2	1	2	2	3	2	2	1	3	2	2	1	2	2	2	3	3	2	4	3	2	3	2	3	2	2	2	2	3	2	2	3	4	2	2	4	4	4	4	4
女	68	城镇医保	正常	否	1	35	1	3	3	2	2	2	2	3	2	2	2	3	2	2	3	2	3	2	2	3	3	2	2	2	3	2	2	2	2	2	2	2	2	3	4	3	2	2	3	4	4	4	3
女	72	新农合	中度	是	1	31	1	3	1	1	2	2	2	4	3	2	2	2	2	2	2	2	3	2	3	3	2	3	2	2	2	2	3	2	2	2	2	2	2	3	3	4	1	2	3	4	3	4	2
女	89	新农合	重度	是	2	23	2	4	1	1	3	4	2	4	2	1	2	3	1	2	2	2	3	2	3	3	2	3	2	2	3	3	3	2	1	3	2	1	2	4	3	4	2	2	4	4	4	3	3
男	79	城镇医保	轻度	是	1	56	3	1	3	2	2	3	3	3	2	2	2	2	2	2	2	2	3	2	3	3	2	3	2	2	2	3	2	2	2	3	2	2	2	3	3	4	2	1	4	4	3	2	2
女	69	城镇医保	轻度	是	2	35	1	2	1	2	2	2	2	2	2	2	2	2	2	2	2	2	3	3	3	3	2	3	2	2	2	2	2	2	2	3	2	1	2	4	2	4	2	2	4	4	4	3	2
女	67	新农合	中度	否	2	38	1	2	1	2	2	2	2	3	2	2	2	2	2	2	2	2	3	2	3	3	2	3	2	2	2	2	3	2	2	3	2	3	1	3	3	4	2	2	4	4	4	3	3
女	65	自费	中度	否	1	35	1	4	1	2	2	1	2	1	2	2	2	2	2	2	2	2	3	2	3	3	2	3	2	2	2	3	3	2	2	2	1	2	3	3	2	4	3	1	4	4	4	3	3
女	67	城镇医保	轻度	是	1	69	1	3	3	2	1	3	3	4	2	2	2	2	2	2	2	2	3	3	2	3	3	3	2	2	2	2	2	2	2	3	2	1	3	3	3	4	2	2	3	1	4	4	3
男	65岁以上	城镇医保	正常	否	2	30	1	1	2	1	2	2	2	2	3	3	2	3	2	2	2	2	3	3	3	3	3	2	2	3	1	1	2	1	2	2	2	2	2	3	2	4	3	3	4	4	4	4	4
男	75	城镇医保	轻度	是	1	50	1	2	1	1	2	2	2	4	2	2	2	2	2	2	2	2	3	3	3	2	3	2	2	3	2	2	3	2	2	2	2	2	2	3	3	4	3	2	4	1	3	3	2
女	35	城镇医保	中度	否	1	68	1	4	1	1	2	3	1	4	2	2	2	3	2	2	3	2	3	3	3	2	3	2	2	2	2	2	2	2	2	2	2	2	2	3	2	4	2	3	3	4	4	3	3
女	80	新农合	中度	是	2	50	1	3	1	1	2	2	2	2	2	2	2	3	2	2	2	3	3	3	2	3	2	2	2	3	3	3	2	1	1	2	2	2	2	3	2	3	2	2	4	4	3	3	3
男	68	新农合	正常	否	2	68	1	4	1	1	3	1	1	4	2	2	2	3	2	2	3	3	3	3	2	2	2	2	2	2	2	2	3	2	2	2	2	2	2	3	2	4	2	2	1	4	1	3	3
女	71	城镇医保	中度	否	2	40	1	2	2	1	2	2	3	4	2	3	1	2	3	3	2	3	3	3	4	4	2	2	1	1	1	2	3	2	2	1	2	2	2	3	2	4	3	2	4	4	4	4	3
女	65	城镇医保	轻度	否	1	75	1	2	2	1	2	2	2	2	1	1	1	3	3	2	1	2	3	3	3	3	2	3	2	2	3	4	3	2	1	2	2	3	2	2	3	4	3	3	4	1	4	4	3
男	80	城镇医保	中度	是	1	44	1	4	1	1	2	3	3	4	1	4	2	2	2	2	2	3	1	3	2	3	4	1	2	3	3	3	3	2	1	1	2	3	2	2	2	4	3	3	4	4	4	4	4
女	66	自费	轻度	是	2	38	1	2	1	2	2	2	3	3	2	1	4	1	2	3	1	2	2	3	3	2	1	3	2	2	1	4	3	3	2	3	2	2	2	3	2	4	3	3	4	4	4	4	4
男	74	城镇医保	轻度	是	2	41	1	1	1	2	2	2	3	4	2	1	3	1	4	2	3	2	3	2	3	3	2	1	2	1	4	2	3	4	1	1	2	2	2	3	2	4	3	3	4	4	4	4	4
男	73	城镇医保	中度	是	2	49	1	2	1	1	2	3	3	4	3	1	1	4	1	3	2	2	4	1	3	3	4	1	2	1	2	3	1	3	3	2	2	2	2	3	3	4	3	3	1	3	3	4	3
女	65	城镇医保	可疑	是	1	39	1	4	1	1	2	2	2	4	4	2	1	3	2	4	3	1	3	3	3	3	3	2	2	1	1	3	2	1	2	1	2	2	2	3	3	4	2	1	4	1	3	3	2
男	79	城镇医保	中度	是	2	49	1	1	2	1	2	3	4	4	2	2	2	2	2	2	2	2	3	2	3	3	3	3	2	3	2	2	3	2	2	2	2	2	2	3	3	4	1	1	4	4	3	4	3
男	74	城镇医保	中度	是	1	53	1	4	1	1	2	2	2	4	2	2	2	2	2	2	2	2	2	3	3	4	2	3	2	2	3	2	3	2	2	2	2	2	2	3	2	2	3	2	4	4	4	4	4
男	66	自费	轻度	否	2	35	1	4	1	1	2	2	2	4	2	2	2	2	2	2	2	2	2	2	2	3	3	3	2	2	3	3	2	3	3	2	2	2	2	3	3	1	3	3	3	3	3	2	2
男	66	城镇医保	轻度	是	1	35	1	2	1	1	1	2	2	3	2	2	2	2	2	2	2	2	3	2	3	4	2	4	2	2	2	3	2	2	2	2	2	2	2	3	3	4	2	1	4	4	4	3	1
男	70	新农合	轻度	是	1	42	1	2	1	1	2	2	2	3	2	2	2	2	2	2	2	2	3	2	4	4	2	4	2	2	2	2	2	2	2	2	1	4	2	2	3	4	2	3	4	3	2	4	3
女	66	新农合	中度	是	1	35	1	4	1	1	2	3	2	3	1	1	1	1	2	2	2	2	3	2	2	3	3	3	2	3	3	3	3	3	3	3	2	4	1	2	2	4	2	2	4	4	4	4	3
女	25	城镇医保	轻度	否	1	50	1	2	1	1	2	1	2	2	2	2	1	2	2	2	2	2	3	2	3	3	2	3	2	2	3	3	3	2	2	3	2	5	1	1	3	4	2	2	4	4	4	4	3
男	81	城镇医保	轻度	是	2	77	1	2	3	1	1	4	3	4	2	3	3	3	2	2	2	2	3	2	2	2	3	2	2	2	2	2	3	2	3	2	2	4	2	1	2	4	2	2	4	4	3	3	2
男	64	自费	轻度	是	2	63	1	1	3	1	1	4	3	3	2	1	1	3	3	1	1	1	4	4	3	4	2	3	2	4	2	2	4	1	1	2	2	1	2	4	2	4	2	3	4	3	3	3	2
女	66	城镇医保	轻度	是	1	35	1	4	1	1	2	2	2	4	1	1	3	4	3	2	1	1	3	2	2	4	3	3	2	2	2	3	2	4	1	2	1	5	2	1	3	3	3	3	3	3	3	3	3
男	75	自费	轻度	是	2	68	1	1	3	1	1	4	3	4	3	1	3	2	2	2	1	3	4	2	4	1	2	3	1	2	1	2	3	3	2	4	4	1	2	2	1	1	1	1	4	4	4	4	4
男	84	城镇医保	中度	是	2	79	1	2	3	1	1	4	4	4	1	1	2	3	3	2	3	2	3	2	2	3	2	3	2	2	2	3	3	3	2	2	4	2	1	2	3	4	4	2	4	2	3	1	4
女	77	城镇医保	轻度	是	2	51	1	1	1	1	2	3	3	4	2	1	4	3	1	4	1	1	3	3	3	3	1	2	3	1	3	3	3	3	2	1	2	2	1	4	3	4	2	2	4	1	3	4	4
男	69	城镇医保	轻度	是	1	42	1	2	1	1	2	2	3	4	2	2	2	2	3	3	2	2	4	3	3	4	3	4	2	2	1	1	2	1	2	2	1	2	5	1	2	4	2	2	4	4	4	4	4
女	76	城镇医保	轻度	是	2	45	1	1	1	1	2	2	2	3	2	3	2	3	1	2	2	2	3	3	2	2	3	2	2	3	2	2	3	4	2	2	1	2	4	2	2	4	2	2	4	4	4	4	4
女	84	城镇医保	可疑	是	2	56	1	3	1	1	2	2	2	4	2	2	2	2	2	2	2	2	3	2	4	3	2	4	2	2	3	2	3	2	2	2	1	2	2	4	3	4	2	2	3	3	3	3	3
女	70	城镇医保	轻度	是	2	46	1	1	1	1	2	3	3	4	2	2	1	2	3	3	2	3	4	3	4	4	2	4	1	2	2	1	3	1	2	1	2	2	2	3	2	4	2	3	1	4	1	4	3
女	63	城镇医保	可疑	是	2	37	1	3	1	1	2	2	3	4	3	2	2	3	3	3	2	3	3	3	3	3	2	3	1	2	3	2	3	1	1	1	2	2	2	3	3	4	2	2	3	1	3	3	3
女	80	城镇医保	可疑	是	1	55	1	2	1	1	2	3	2	4	2	2	2	2	3	2	2	3	3	2	3	3	2	4	2	2	2	2	3	2	2	2	3	2	2	2	2	4	1	1	4	4	4	4	4
女	70	城镇医保	轻度	是	2	43	1	2	1	1	2	3	3	4	2	2	2	2	2	2	2	2	3	3	3	3	2	3	2	2	3	3	3	2	2	2	2	2	2	3	2	1	2	3	4	4	3	1	3
男	72	城镇医保	中度	是	2	67	1	1	3	1	1	4	4	4	2	2	2	2	2	2	2	2	3	3	3	3	2	2	2	2	3	3	3	2	2	3	2	2	2	3	2	4	1	1	4	4	4	4	4
女	81	城镇医保	轻度	是	2	43	1	3	1	1	2	2	3	3	2	2	2	3	3	3	3	3	3	2	2	3	2	3	2	3	2	2	2	2	1	2	2	2	2	3	4	4	4	2	4	3	3	2	2
男	87	城镇医保	轻度	是	2	73	1	3	3	1	1	4	3	4	4	1	4	1	2	3	1	2	2	4	1	3	3	1	3	2	2	1	2	3	3	4	3	2	2	2	2	4	2	2	2	3	4	3	3
男	84	城镇医保	中度	是	2	79	1	2	3	1	1	4	4	4	2	2	3	3	3	2	3	2	1	2	4	4	2	2	1	3	1	3	4	2	2	1	2	2	2	3	2	4	3	2	4	3	2	3	3
男	75	自费	轻度	是	2	68	1	1	3	1	1	4	3	4	2	2	1	2	3	2	2	2	3	2	3	3	2	3	2	2	3	3	3	2	2	3	2	2	2	3	2	4	2	3	4	1	3	3	3
男	71	城镇医保	轻度	是	2	47	1	2	1	1	2	4	3	4	2	2	2	3	3	3	2	2	3	2	3	3	3	3	1	2	2	4	3	1	2	2	2	2	2	3	3	4	2	1	4	4	4	3	1
男	59	城镇医保	轻度	否	2	26	1	3	1	1	2	1	2	3	2	2	2	2	2	2	2	2	2	2	2	3	3	3	3	3	3	3	3	3	2	2	2	2	3	2	2	4	3	3	3	3	4	3	4
女	68	城镇医保	中度	是	2	42	1	3	2	1	2	2	2	4	2	2	1	2	3	3	2	2	3	3	3	3	2	3	2	2	3	3	3	2	2	2	2	2	3	2	3	4	2	2	4	4	3	3	2
女	77	自费	中度	是	2	54	1	4	3	1	2	3	2	4	2	2	1	2	2	2	2	2	3	2	3	3	2	3	2	2	4	4	3	2	2	3	2	2	2	3	3	4	4	1	4	2	3	3	3
女	86	城镇医保	轻度	是	2	45	1	3	2	2	3	2	4	4	2	2	2	3	2	2	2	2	4	4	3	4	3	3	2	2	2	2	3	1	2	1	2	2	2	3	2	4	2	2	4	4	3	3	3
男	70	城镇医保	中度	是	2	64	1	2	3	1	1	2	2	3	2	3	2	3	2	2	3	3	3	3	3	2	1	2	2	2	3	2	4	2	2	2	2	2	3	2	3	4	2	2	4	4	3	3	2
女	70	城镇医保	轻度	是	2	30	1	3	1	1	3	2	2	4	2	2	3	3	1	3	2	2	2	4	3	2	2	3	1	1	4	3	4	3	1	2	2	2	2	3	2	4	4	2	4	4	4	3	2
女	82	城镇医保	轻度	是	2	53	2	3	3	1	3	1	2	3	2	2	4	1	2	2	3	4	3	1	3	1	2	2	2	2	4	2	2	3	2	4	1	1	2	4	2	4	2	2	4	4	4	3	2
女	80	城镇医保	中度	是	2	42	1	2	2	2	3	2	2	2	4	1	2	3	1	2	1	3	3	1	3	3	4	1	2	2	2	3	3	3	3	3	2	2	2	2	2	4	2	2	3	3	3	3	1
男	55	城镇医保	可疑	否	2	55	1	3	1	1	1	1	2	4	4	1	3	1	2	4	2	2	2	2	2	3	1	4	2	3	1	4	3	4	1	2	2	2	2	2	2	1	1	2	1	4	4	4	4
男	71	城镇医保	轻度	是	2	46	1	3	1	1	2	1	1	4	2	2	2	2	1	2	1	2	3	2	3	3	2	3	3	2	3	4	3	3	3	2	1	1	1	5	2	1	2	2	3	3	3	3	3
女	67	城镇医保	可疑	否	2	27	1	4	1	1	3	2	1	4	2	2	2	3	2	2	1	2	3	2	4	3	4	3	1	2	1	3	3	3	3	2	2	2	2	2	2	4	3	2	1	1	4	3	3
女	71	自费	正常	是	2	43	1	3	1	1	2	2	1	4	2	2	2	3	2	2	3	2	3	3	3	3	2	3	3	2	3	2	3	2	2	2	2	2	2	2	2	4	3	1	1	1	4	3	2
女	88	城镇医保	中度	是	1	28	2	4	1	1	3	2	1	4	2	2	1	2	2	2	2	3	4	3	3	4	2	4	2	2	3	2	4	2	2	1	2	2	2	2	3	4	2	2	1	1	4	3	2
男	66	自费	可疑	否	2	25	1	4	1	1	2	2	1	4	2	2	2	3	2	3	2	2	3	2	3	4	2	4	2	2	2	3	2	3	2	2	2	2	2	2	1	1	1	1	3	2	4	3	2
男	85	新农合	重度	是	2	55	1	3	3	1	2	2	2	3	2	2	2	2	2	2	2	2	3	3	3	3	2	3	2	3	3	3	3	2	2	3	1	1	2	4	2	4	1	2	4	4	1	1	1
女	65	城镇医保	中度	否	2	63	1	3	3	1	1	2	3	4	2	2	1	2	2	2	2	2	3	3	3	3	2	3	2	2	4	4	3	2	2	3	1	1	2	4	2	1	2	2	3	3	3	3	3
女	60	自费	可疑	否	2	35	1	3	1	2	2	2	2	3	2	3	1	3	2	2	2	3	3	3	3	3	3	3	2	2	3	2	4	1	2	2	2	2	2	2	2	4	2	2	2	2	3	3	2
女	51	自费	可疑	否	2	21	2	4	1	1	2	1	1	3	3	3	2	3	3	4	1	2	3	3	2	2	2	3	3	1	1	2	3	3	3	2	2	1	2	3	1	1	3	1	3	4	4	2	2
男	67	新农合	轻度	否	2	33	1	2	1	1	3	1	1	3	2	3	2	2	1	3	3	4	4	2	3	3	3	3	2	1	2	2	2	2	4	1	2	2	2	2	2	4	2	2	4	1	2	3	1
男	45	城镇医保	可疑	否	2	45	1	3	2	1	1	1	2	4	3	1	2	3	1	4	2	1	4	2	3	3	2	2	2	2	2	3	3	4	3	2	1	1	3	3	2	4	1	1	4	3	3	2	2
女	83	新农合	中度	是	2	30	1	4	1	1	3	2	1	4	3	3	3	2	2	4	1	2	4	1	1	3	3	4	2	3	3	1	4	3	1	1	2	2	2	2	2	4	2	2	3	3	3	2	2
女	79	城镇医保	轻度	否	2	60	1	2	2	2	3	1	2	3	1	1	1	4	3	3	2	1	4	2	3	3	1	3	2	3	2	4	3	2	2	4	2	2	2	2	2	2	1	2	1	4	1	4	2
女	60	城镇医保	可疑	否	1	35	1	3	1	1	3	1	1	3	3	3	3	4	3	2	3	2	1	3	3	3	1	3	2	4	2	1	1	4	2	1	2	1	2	3	3	4	2	2	2	4	4	2	1
女	92	城镇医保	轻度	是	2	50	1	3	3	1	3	2	2	4	2	2	2	3	2	3	2	2	4	2	3	3	3	3	2	2	3	3	3	2	2	2	1	2	2	3	1	4	2	2	2	1	3	4	2
女	73	城镇医保	中度	是	2	45	1	4	1	1	2	1	1	4	2	2	2	3	3	3	2	2	3	2	3	3	2	3	2	2	3	3	3	2	2	3	2	2	2	2	1	1	2	3	2	1	1	2	1
女	66	城镇医保	轻度	是	2	40	1	4	1	1	2	1	1	4	2	2	2	2	2	2	2	3	3	3	3	3	3	3	2	3	3	3	3	2	2	2	1	1	2	4	2	2	3	1	1	2	1	2	2
男	60	城镇医保	轻度	否	1	35	1	4	1	1	2	1	1	4	2	2	2	3	2	2	2	2	3	3	2	3	2	4	3	2	3	3	3	3	2	2	1	1	1	5	2	2	2	4	3	3	3	3	2
女	78	新农合	轻度	是	2	22	2	4	1	1	3	2	1	4	2	2	1	3	2	3	2	2	3	4	4	3	2	3	2	1	4	3	3	1	2	3	2	2	2	2	3	4	1	3	4	3	3	2	2
女	87	新农合	中度	是	2	63	1	3	3	1	2	2	2	4	2	2	2	3	3	3	2	2	3	2	3	3	2	3	2	2	3	3	3	2	2	3	2	2	2	2	2	4	2	2	4	3	3	1	3
男	62	城镇医保	中度	否	1	32	1	3	1	1	3	1	1	3	3	3	2	3	2	2	2	2	3	2	3	3	2	3	2	2	3	3	3	2	2	3	2	2	2	2	2	4	3	1	3	1	3	2	3
男	68	城镇医保	中度	是	2	65	1	2	3	1	1	2	3	3	3	2	1	2	2	2	2	2	3	3	3	3	2	3	2	2	4	4	3	2	2	3	2	2	2	2	3	4	2	1	3	1	4	2	3
女	44	城镇医保	可疑	否	2	21	2	4	1	1	2	1	1	4	2	2	2	3	2	2	2	3	3	3	3	3	2	3	2	2	3	3	3	2	2	3	2	2	2	2	2	4	3	2	4	1	3	3	1
男	48	城镇医保	轻度	是	2	48	1	3	1	1	1	1	1	3	2	2	1	3	2	2	3	3	4	3	4	4	3	3	2	3	2	2	4	1	1	1	2	2	2	2	3	4	2	2	4	4	1	2	1
女	70	城镇医保	重度	是	1	70	1	2	3	1	1	2	3	3	1	2	2	1	2	2	2	2	2	3	3	3	2	4	3	3	4	3	2	3	3	3	2	2	2	2	2	4	2	2	3	3	3	3	3
女	61	新农合	轻度	是	2	60	1	1	3	2	2	2	2	2	4	3	1	4	2	2	1	3	1	3	3	3	2	3	2	2	2	1	3	4	2	4	2	2	2	2	2	1	1	2	1	3	1	3	3
女	77	城镇医保	轻度	是	2	35	1	3	1	1	3	2	1	3	2	1	2	3	3	2	3	2	2	3	3	3	3	4	3	3	2	3	1	2	3	2	2	2	2	2	3	4	3	3	1	3	1	3	1
男	75	城镇医保	轻度	是	1	45	1	3	1	1	2	3	2	4	3	1	3	4	2	4	3	1	3	1	2	2	3	3	2	2	3	4	2	2	2	3	2	2	2	2	2	4	2	2	3	3	3	3	3
女	59	城镇医保	可疑	否	1	62	1	4	3	1	1	1	2	3	4	4	3	3	3	4	3	1	3	3	1	2	2	2	2	2	1	2	3	4	1	2	1	1	4	2	1	4	1	1	4	4	4	4	4
女	85	城镇医保	重度	是	2	48	1	3	1	1	3	1	1	4	2	3	2	4	4	2	1	1	2	2	2	3	2	2	2	4	3	2	2	3	3	4	2	1	1	4	2	4	1	1	3	3	3	3	1
男	76	新农合	中度	是	1	36	1	3	1	1	2	2	1	3	3	3	3	2	2	2	3	2	2	3	3	3	3	2	2	2	3	3	3	3	2	2	2	2	2	2	2	4	2	2	3	3	3	2	1
女	65	城镇医保	轻度	是	2	42	1	3	1	1	2	1	2	3	2	2	2	2	3	3	2	3	4	2	4	4	3	3	2	2	3	1	3	2	2	2	2	4	1	1	2	3	2	2	2	3	2	3	2
女	55	自费	可疑	否	1	55	1	3	1	1	1	1	1	4	3	2	2	3	3	1	3	3	3	3	3	3	3	3	2	2	2	3	2	2	2	3	2	2	2	2	2	3	2	2	1	2	1	3	1
女	68	城镇医保	中度	是	2	43	1	4	1	1	2	2	1	4	2	3	1	2	2	2	2	2	3	3	3	3	2	3	2	3	4	4	3	2	2	3	4	2	1	1	2	4	2	1	3	3	3	3	1
女	79	城镇医保	重度	是	1	55	1	3	3	1	2	2	3	4	2	3	2	3	2	2	2	3	3	3	3	3	2	3	2	2	3	3	3	2	2	3	2	2	2	2	2	2	1	1	2	2	2	2	1
女	70	城镇医保	轻度	否	2	50	1	4	1	1	2	1	1	4	2	2	1	2	3	3	3	3	3	3	3	3	2	3	2	2	3	3	3	2	2	3	2	2	2	2	1	3	3	1	2	1	1	2	2
女	50	城镇医保	可疑	否	1	50	1	3	1	1	1	1	1	4	1	3	1	3	2	2	2	2	3	3	3	3	3	4	2	3	3	2	4	3	2	2	2	1	1	4	2	1	2	1	3	2	3	1	1
男	77	自费	轻度	是	2	39	1	4	1	1	3	2	2	4	4	2	2	4	3	2	1	2	4	3	3	2	2	3	2	1	2	3	4	3	3	1	3	2	1	2	3	4	4	2	3	3	4	3	3
女	90	城镇医保	中度	是	1	63	1	4	3	1	2	3	3	4	1	3	1	3	2	2	4	3	2	2	3	4	1	3	2	2	4	2	1	4	3	4	5	1	1	1	3	4	3	3	4	2	4	2	3
女	60	新农合	可疑	是	2	50	1	2	1	2	3	1	2	3	4	1	3	2	2	3	2	4	3	3	3	3	2	2	2	2	3	1	3	3	3	2	1	2	4	1	2	4	2	2	3	3	3	3	2
女	70	城镇医保	可疑	是	1	50	1	2	1	1	2	2	2	3	1	2	1	4	3	3	2	1	4	2	3	1	3	3	2	2	3	4	3	3	4	2	1	2	1	4	3	4	4	3	4	1	4	2	1
男	69	新农合	重度	是	2	30	2	3	1	1	3	2	3	3	4	3	2	1	4	3	1	2	2	4	2	3	1	2	2	3	4	4	3	3	1	2	2	2	2	2	2	4	2	2	3	3	3	3	2
女	84	城镇医保	轻度	是	2	59	1	3	3	1	2	3	3	4	2	1	1	3	1	2	2	1	4	3	4	3	2	4	3	2	4	3	2	3	3	3	1	1	2	4	2	4	2	1	4	4	4	3	3
男	80	城镇医保	轻度	是	1	30	2	4	1	1	3	1	1	4	4	3	2	2	3	2	2	2	4	4	4	2	4	2	2	1	3	3	2	1	2	2	2	2	2	2	3	4	2	2	3	4	3	3	2
女	73	自费	可疑	否	1	50	1	3	1	1	3	1	1	4	2	1	2	1	2	4	4	2	4	2	3	2	2	1	3	3	4	1	4	2	3	4	2	2	2	2	2	4	2	1	4	3	3	3	3
男	63	自费	可疑	否	2	60	1	3	3	1	1	1	2	3	3	3	2	3	2	2	3	3	3	2	2	2	3	3	3	3	2	2	3	2	3	3	1	1	1	5	3	4	3	2	4	3	3	2	2
男	64	城镇医保	中度	是	1	60	1	2	3	1	3	1	2	3	3	3	1	4	2	3	3	2	4	3	3	4	3	4	2	1	2	3	3	2	1	1	1	1	2	4	2	4	1	2	3	3	3	2	1
男	80	新农合	可疑	是	2	76	1	1	3	2	1	4	1	3	2	2	1	4	3	3	2	2	4	2	3	4	3	3	1	3	3	3	3	1	2	3	2	2	2	2	2	4	1	2	4	4	4	4	4
男	71	城镇医保	可疑	否	2	79	1	3	3	1	1	1	2	2	3	2	2	3	2	3	3	2	2	2	2	3	3	3	3	3	3	3	2	2	3	3	2	1	2	3	2	4	2	2	3	3	3	3	3
女	68	城镇医保	轻度	否	2	38	1	2	2	1	2	2	4	1	2	2	2	3	3	3	2	2	4	3	4	3	2	4	2	2	3	2	3	2	2	2	2	2	2	2	3	4	3	3	3	1	4	1	1
男	80	城镇医保	轻度	否	2	23	1	3	1	1	2	4	3	2	2	2	2	4	3	3	3	2	3	3	3	3	2	4	2	2	3	2	3	2	2	2	1	2	2	3	3	4	2	2	1	4	1	3	1
男	60	城镇医保	轻度	是	2	65	1	1	3	2	1	2	2	1	2	2	1	3	3	2	2	3	4	4	3	4	2	4	2	1	4	3	3	1	1	3	2	2	2	2	3	1	1	3	4	3	4	1	3
男	83	城镇医保	轻度	是	2	83	1	3	3	1	1	2	2	1	2	3	3	3	3	2	2	2	3	3	3	3	3	3	2	2	2	3	3	2	2	3	2	2	2	2	3	4	3	3	3	1	4	1	1
男	79	新农合	可疑	是	2	64	1	2	3	1	1	4	2	2	2	2	2	3	3	2	2	3	3	3	3	3	3	3	2	2	3	3	3	2	2	3	2	2	2	2	2	4	1	2	4	3	1	3	3
男	69	城镇医保	可疑	是	2	69	1	3	3	2	1	1	2	1	2	2	2	2	2	2	2	2	3	3	3	3	2	3	2	4	4	4	3	2	2	3	2	2	2	2	2	4	3	2	3	1	3	3	3
女	68	新农合	中度	否	1	69	1	1	3	1	1	2	3	1	3	3	2	3	2	2	2	3	3	3	3	3	2	3	2	2	3	3	3	2	2	3	1	1	1	5	2	4	2	1	3	1	4	3	3
男	84	新农合	轻度	是	2	44	3	3	1	1	2	4	3	1	2	3	2	3	2	2	3	3	3	3	3	3	2	3	2	3	2	3	3	3	2	2	2	2	1	3	2	4	1	1	4	4	4	3	3
女	65	新农合	中度	是	2	43	1	4	1	1	2	2	2	3	2	2	3	2	2	3	4	4	3	3	3	2	3	2	2	2	2	2	3	2	3	3	1	1	2	4	2	2	3	4	3	3	2	3	2
男	64	新农合	轻度	否	2	29	1	1	1	1	2	4	2	3	3	3	2	3	2	2	2	2	3	3	3	4	3	3	2	3	2	3	2	3	2	2	2	2	2	2	3	4	1	1	4	4	4	3	2
女	64	城镇医保	轻度	否	1	85	1	1	3	1	1	4	4	1	2	2	1	3	2	4	1	3	3	3	3	2	4	4	2	2	3	3	3	4	1	2	2	3	2	1	3	4	2	1	3	4	4	3	3
男	69	新农合	可疑	是	2	69	1	1	3	2	1	1	1	1	3	3	2	2	2	3	2	3	4	2	3	3	1	3	2	3	4	4	3	2	2	1	2	2	2	2	2	4	3	3	3	3	3	3	3
男	67	新农合	轻度	是	2	68	1	2	3	2	1	2	1	1	2	2	1	3	1	4	2	3	3	3	3	4	3	2	2	4	2	3	3	3	2	2	2	1	2	2	2	4	1	2	3	4	4	4	3
女	81	新农合	中度	是	2	39	1	1	1	1	2	4	1	1	2	2	2	3	3	2	2	2	3	3	3	3	3	3	2	3	3	3	3	2	2	3	2	1	2	2	2	4	2	2	1	4	4	3	2
男	69	新农合	可疑	否	2	63	1	2	3	2	1	2	2	3	2	2	1	3	4	3	4	3	2	4	3	3	2	3	1	2	1	4	4	3	1	2	1	1	1	4	1	4	1	3	3	2	2	3	2
男	67	新农合	可疑	否	2	66	1	2	3	1	1	1	4	1	2	2	2	2	3	2	2	2	3	3	3	3	2	4	2	2	4	4	3	2	2	3	1	2	2	2	2	4	1	2	3	3	3	3	3
男	69	城镇医保	轻度	否	2	24	3	2	1	2	2	2	2	2	2	3	2	3	2	2	3	2	2	3	2	3	2	4	2	2	4	4	3	2	2	3	1	1	1	4	3	4	1	1	3	4	1	4	1
女	64	城镇医保	重度	是	1	33	1	1	2	1	2	4	2	1	3	3	2	3	2	2	3	2	3	3	3	3	3	3	2	2	2	3	3	3	2	3	1	1	1	4	2	3	3	1	3	2	2	2	2
女	79	新农合	中度	否	1	40	3	4	1	1	2	1	2	1	3	2	2	3	3	2	2	1	4	2	4	4	2	3	2	2	4	3	4	2	1	3	2	2	1	2	2	4	2	2	4	4	4	1	1
男	83	城镇医保	中度	否	2	76	1	2	3	2	1	3	2	1	3	2	2	3	2	3	2	2	3	3	4	4	2	4	2	3	2	3	3	2	2	2	1	1	2	3	1	4	2	2	4	4	3	3	3
男	83	城镇医保	轻度	是	2	60	1	2	3	1	2	4	2	3	3	3	2	3	1	3	3	3	3	3	3	3	2	4	2	2	2	2	3	3	2	3	2	2	1	2	2	4	2	2	3	3	3	3	3
男	80	新农合	重度	是	2	71	1	3	3	2	1	2	4	2	3	3	2	3	2	2	2	2	3	2	3	3	2	4	2	2	4	4	3	2	2	3	2	1	1	3	3	4	1	3	4	1	3	4	3
男	35	城镇医保	轻度	否	2	33	1	2	1	1	1	2	1	3	3	2	2	3	2	2	2	2	3	3	3	3	2	4	2	2	4	4	3	2	2	3	1	1	2	3	2	4	2	2	4	3	3	2	2
女	70	城镇医保	轻度	否	2	40	1	3	1	1	2	2	1	2	2	1	3	4	2	3	4	4	4	3	3	3	2	3	2	3	2	1	3	2	2	2	1	1	1	4	2	2	2	1	4	3	4	3	2
女	65	城镇医保	中度	是	2	40	1	3	1	1	2	2	2	3	3	2	2	2	4	3	3	2	3	1	3	3	3	2	2	3	3	4	3	3	1	3	2	1	2	2	2	4	4	1	1	4	2	4	4
男	66	城镇医保	正常	否	2	40	1	4	2	1	1	2	2	2	2	2	1	4	1	4	2	4	3	3	3	2	3	3	2	2	3	3	4	4	1	2	1	1	3	2	2	1	2	1	4	3	4	4	3
女	69	新农合	轻度	否	1	80	1	3	3	1	1	1	2	3	2	2	2	3	3	3	2	2	3	3	3	3	2	3	2	2	4	4	3	2	2	3	1	1	1	4	3	4	2	2	4	4	3	3	1
男	65	新农合	轻度	是	2	67	1	2	3	2	1	4	4	1	2	3	2	3	3	3	2	3	3	3	3	3	3	3	2	2	3	3	3	2	2	3	1	1	1	4	2	4	1	1	4	4	4	3	2
男	75	城镇医保	可疑	是	2	66	1	1	3	2	1	2	1	2	2	3	1	4	2	2	2	3	3	3	3	3	4	3	2	2	3	2	4	3	3	2	1	1	1	4	2	4	2	2	3	4	3	2	1
男	62	新农合	可疑	否	2	83	1	1	3	1	1	1	1	3	3	3	4	3	2	4	2	2	3	2	2	3	4	3	2	4	2	2	4	2	2	1	1	1	1	4	2	4	2	2	4	4	3	2	1
女	73	新农合	中度	是	1	63	1	1	3	1	1	1	3	2	3	4	2	1	2	3	3	1	3	4	2	3	1	3	2	2	2	3	4	3	4	4	1	1	2	3	2	4	2	1	4	4	4	3	2
女	81	新农合	中度	否	2	39	3	2	1	2	2	1	4	3	3	1	2	4	2	4	1	3	3	1	3	4	3	2	2	2	4	3	4	3	2	3	1	1	2	3	2	4	1	2	4	4	2	3	2
女	70	自费	轻度	是	1	66	1	3	3	1	1	2	2	2	1	2	1	3	3	4	1	4	4	3	3	3	2	3	4	4	1	3	2	2	2	4	1	1	2	3	3	4	3	2	4	4	2	2	1
男	66	新农合	重度	否	2	67	1	1	3	1	1	2	2	3	2	3	2	3	3	3	2	2	3	3	3	3	2	3	2	2	4	4	3	2	2	3	2	1	2	2	2	4	1	1	4	2	4	3	2
男	72	城镇医保	轻度	否	2	69	1	1	3	2	1	2	4	2	3	3	2	3	2	2	3	2	3	3	2	3	2	4	2	2	4	4	3	2	2	3	2	2	1	2	2	2	3	2	2	2	2	3	3
男	79	新农合	轻度	否	2	40	1	2	1	2	2	3	1	4	3	3	2	3	3	3	3	3	4	3	3	4	2	3	2	2	3	2	2	2	2	3	1	1	2	3	2	2	2	3	3	1	2	3	2
男	83	新农合	中度	否	2	74	1	3	3	2	1	2	1	3	3	3	2	3	2	2	3	3	3	3	3	3	2	3	2	3	3	3	3	2	3	3	1	1	2	3	3	4	2	3	2	3	3	3	2
女	68	新农合	重度	否	2	26	1	4	2	1	2	4	2	2	3	3	3	2	2	3	2	2	3	2	2	3	3	3	3	3	3	3	3	3	3	3	2	2	1	2	3	2	3	3	3	3	4	3	3
男	70	城镇医保	中度	否	2	67	1	3	3	1	1	1	2	1	3	3	2	3	3	3	2	2	3	3	3	3	2	3	2	2	4	4	3	2	2	3	2	1	2	2	3	2	2	2	4	4	4	2	4
男	80	新农合	轻度	否	2	41	1	2	2	1	2	1	2	1	3	2	3	3	4	2	3	2	3	3	3	4	3	3	3	2	2	2	4	2	2	2	1	2	2	2	2	3	2	1	1	4	1	4	3
男	69	新农合	轻度	是	2	68	1	1	3	2	1	2	3	3	4	1	2	2	4	2	2	3	3	1	3	2	4	2	3	1	4	4	3	4	3	3	1	2	2	2	4	4	2	2	3	2	3	3	2
男	82	城镇医保	轻度	是	1	44	1	1	1	1	2	1	2	3	2	2	2	4	2	4	4	1	3	2	1	3	3	3	4	3	3	4	2	2	2	4	2	2	1	2	4	2	4	4	4	1	2	1	1
男	65	新农合	轻度	是	2	37	1	1	1	1	2	2	1	1	3	2	2	3	3	3	3	2	3	3	3	4	3	4	2	3	2	3	4	2	2	2	1	1	1	4	2	4	4	2	3	1	4	2	1
女	76	城镇医保	轻度	是	1	82	1	1	3	1	1	2	3	2	3	2	3	3	2	2	3	3	3	3	3	3	3	3	2	3	3	3	3	3	2	3	2	2	1	2	3	4	2	1	3	3	3	3	3
女	66	新农合	轻度	否	2	39	1	2	2	2	2	1	3	2	3	3	3	3	3	2	3	3	3	3	3	3	2	3	2	2	3	4	3	2	2	3	1	1	2	2	2	3	2	1	1	4	1	4	3
男	71	城镇医保	重度	否	2	65	1	4	3	2	1	2	2	1	2	2	2	3	2	2	3	3	3	3	3	3	3	3	3	2	4	2	4	2	4	3	2	1	2	1	3	1	1	2	4	4	3	3	2
女	65	城镇医保	轻度	是	1	30	1	2	1	2	2	4	3	4	2	2	3	3	2	1	2	3	3	3	4	4	3	3	3	3	3	3	4	3	2	2	1	1	3	1	3	4	2	1	3	3	3	2	1
男	60	自费	轻度	否	2	34	1	3	1	1	2	1	2	2	1	3	4	4	3	3	2	4	2	1	3	2	4	2	2	1	3	1	4	4	4	4	1	1	2	2	2	4	3	1	4	1	4	3	1
女	78	城镇医保	中度	是	1	83	1	2	3	1	1	4	3	1	4	4	4	3	3	4	2	2	4	3	3	3	2	3	2	2	3	3	1	3	1	2	2	2	1	1	3	4	2	2	1	1	4	4	3
女	60	城镇医保	重度	否	1	32	1	2	1	1	2	1	4	2	3	3	2	3	3	3	3	3	3	3	3	3	2	4	2	2	3	3	3	2	2	3	1	1	1	3	3	4	1	1	4	4	3	2	2
男	70	新农合	轻度	是	2	65	1	2	3	2	1	2	2	3	3	3	1	3	3	3	3	3	3	3	3	3	3	3	3	2	3	3	3	4	2	2	1	1	1	3	3	4	1	2	1	4	2	4	2
男	62	城镇医保	轻度	否	2	57	1	2	3	1	1	2	2	4	3	3	1	3	3	3	3	3	3	3	3	3	3	3	3	2	3	3	3	4	2	2	2	1	1	2	3	2	1	2	3	2	1	1	2
女	67	城镇医保	可疑	是	2	32	1	3	1	1	2	2	2	4	3	3	3	2	2	3	3	3	4	3	3	3	3	3	2	3	3	2	3	2	3	3	1	1	1	3	4	4	1	2	3	1	3	4	3
男	70	新农合	轻度	是	2	40	1	1	2	2	2	2	3	3	3	3	2	3	3	2	3	3	3	3	4	3	2	3	3	2	3	3	2	3	3	3	1	1	1	3	2	4	2	2	1	1	3	4	2
男	72	新农合	中度	是	2	69	1	3	3	1	1	2	2	1	3	3	2	3	3	3	3	3	3	3	3	3	2	4	2	3	3	3	3	2	2	3	1	1	1	3	2	4	2	2	1	3	1	4	1
男	85	新农合	轻度	否	2	75	1	1	3	1	1	2	2	2	3	2	2	2	2	2	3	3	3	4	4	4	4	4	2	3	3	3	2	2	3	2	1	1	1	3	3	4	2	3	1	4	1	1	1
女	76	新农合	轻度	是	1	77	1	3	3	1	1	1	2	1	1	3	4	3	4	3	1	2	4	3	3	3	4	3	2	2	4	3	2	2	3	3	1	1	1	3	2	4	2	2	4	2	3	1	4
女	62	新农合	轻度	否	1	69	1	4	3	2	1	1	4	3	4	1	4	4	4	1	4	4	1	2	4	4	2	4	3	2	2	2	3	2	3	3	1	1	1	3	3	4	4	4	3	1	4	1	1
男	61	新农合	轻度	否	2	65	1	1	3	2	1	2	4	1	3	3	2	3	3	3	3	3	3	3	3	3	2	3	2	3	4	4	3	2	2	3	1	1	1	3	2	4	2	1	3	2	3	3	3
男	65	城镇医保	重度	否	2	25	1	1	1	1	2	1	2	3	2	3	2	3	3	3	3	3	3	3	3	3	3	3	2	3	3	3	3	3	3	3	1	1	1	3	2	4	2	2	3	2	3	3	2
男	68	自费	重度	是	2	61	1	4	3	2	1	1	3	1	2	3	3	3	3	2	3	3	4	3	3	2	3	3	3	3	2	3	3	4	3	3	2	1	1	2	1	4	2	2	4	1	4	3	3
男	65	新农合	轻度	否	2	63	1	1	3	1	1	4	2	1	2	3	2	3	2	2	2	2	3	3	2	3	3	4	3	4	4	4	3	3	3	4	1	1	1	3	2	4	1	1	3	3	3	3	3
女	84	新农合	轻度	是	1	37	1	1	2	1	2	1	2	2	3	3	2	3	3	3	3	3	3	3	3	3	2	4	3	2	4	4	3	2	2	3	1	1	1	3	3	4	4	4	3	1	4	1	1
女	77	城镇医保	轻度	是	1	32	3	3	1	1	2	3	3	4	3	3	2	3	2	2	3	3	3	3	3	3	3	4	3	3	4	4	3	2	3	3	1	1	2	2	2	4	3	3	3	4	3	1	3
男	82	城镇医保	中度	是	2	70	1	1	3	1	1	2	1	2	3	3	2	3	2	2	3	2	3	3	2	3	3	4	3	3	4	4	3	3	3	4	1	1	1	3	2	4	2	2	4	3	3	3	3
男	58	新农合	重度	否	1	37	3	2	2	1	2	4	4	3	3	3	2	3	3	3	3	3	3	3	3	3	2	4	2	3	4	4	3	2	3	3	1	1	1	3	2	4	1	1	3	1	3	2	1
男	66	城镇医保	可疑	否	2	74	1	3	3	1	1	2	4	2	3	3	3	4	3	3	3	3	2	2	3	3	3	3	3	3	3	3	3	3	3	3	1	1	1	3	3	3	1	3	1	3	1	3	3
男	83	自费	中度	是	1	42	1	4	1	1	2	1	1	2	3	4	3	3	3	3	3	3	3	3	3	3	3	3	3	2	3	3	3	3	3	3	1	1	2	2	2	4	1	1	3	3	3	3	2
女	85	新农合	重度	是	1	83	1	2	3	1	1	2	3	1	3	3	3	3	3	3	3	3	3	3	3	3	3	3	3	3	3	3	3	3	3	3	1	1	1	3	2	4	2	1	3	4	3	3	2
男	69	城镇医保	中度	是	1	28	1	2	2	1	2	1	2	3	3	3	3	3	3	3	3	3	3	3	3	3	3	3	3	3	3	3	3	3	3	3	2	2	1	1	3	4	2	2	1	3	4	3	2
女	71	新农合	轻度	是	1	71	1	3	3	1	1	1	2	1	3	3	3	3	3	3	3	3	3	3	3	3	3	3	3	3	3	3	3	3	3	3	1	2	2	1	2	4	2	2	3	3	3	3	2
男	66	城镇医保	轻度	否	2	28	1	1	1	2	2	4	4	1	3	3	2	3	2	2	3	3	2	3	4	4	3	4	3	1	4	3	4	3	3	4	1	2	2	1	2	4	2	2	4	3	3	2	2
女	80	新农合	重度	是	1	78	1	2	3	1	1	1	2	1	3	3	3	3	3	3	3	3	3	3	3	3	3	3	3	3	3	3	3	3	3	3	2	1	1	2	3	4	2	2	2	4	2	4	1
男	73	城镇医保	轻度	否	2	80	1	1	3	2	1	2	4	2	2	3	2	3	2	2	3	2	3	3	3	3	3	4	3	4	4	4	3	3	3	4	1	1	1	3	1	2	1	2	3	4	3	3	1
男	70	新农合	轻度	否	2	85	1	2	3	2	1	2	3	1	3	3	2	3	3	3	3	3	3	3	3	3	3	4	2	3	4	4	3	2	3	3	1	1	1	3	2	2	1	2	2	2	2	2	3
女	67	新农合	轻度	否	1	80	1	1	3	1	1	1	4	2	4	4	3	3	3	3	3	3	3	3	3	3	3	3	2	3	3	2	3	3	3	3	1	1	1	3	1	4	1	2	4	3	4	3	3
男	65	新农合	中度	是	2	79	1	2	3	2	1	1	2	1	3	4	3	3	3	4	3	2	3	4	3	3	2	3	3	4	2	3	2	3	3	3	1	1	1	3	3	4	3	1	2	2	2	4	2
男	75	新农合	轻度	是	2	43	1	4	2	1	2	4	2	1	2	3	2	3	2	2	3	3	4	4	4	4	4	4	2	3	3	4	3	2	2	3	1	1	1	3	2	4	1	1	4	1	3	1	2
女	64	城镇医保	可疑	是	2	37	1	4	1	1	2	2	2	4	3	2	2	4	2	3	3	3	3	3	4	4	3	4	2	3	4	3	3	3	3	3	1	1	1	3	2	1	2	2	2	3	2	2	2
男	77	城镇医保	轻度	是	2	69	1	1	3	1	1	4	3	4	3	3	2	3	3	2	3	3	3	3	3	3	3	4	3	3	4	4	3	3	3	4	1	1	1	3	1	4	1	2	4	3	4	3	3
女	66	自费	轻度	是	2	38	1	2	1	2	2	2	3	3	3	3	2	3	3	3	3	3	3	3	3	3	3	4	3	3	4	4	3	3	3	4	1	1	1	3	3	4	1	2	4	3	3	3	2
男	82	城镇医保	中度	是	2	78	1	2	3	1	1	4	3	4	2	3	2	4	2	2	4	4	4	4	4	3	3	4	2	3	3	3	4	3	3	3	1	1	1	3	2	4	2	1	4	3	2	4	2
男	75	城镇医保	中度	是	1	44	1	3	1	1	2	2	2	4	3	3	2	3	3	3	3	3	3	3	3	3	3	4	3	3	4	4	3	3	3	4	1	1	1	3	2	4	2	1	4	4	3	2	1
女	67	城镇医保	中度	是	1	43	1	3	1	1	2	1	2	4	2	2	2	3	2	2	4	3	4	4	4	4	4	3	4	4	3	3	3	4	3	3	1	1	1	3	3	3	2	3	1	4	1	3	3
女	76	城镇医保	轻度	是	2	45	1	1	1	1	2	3	2	4	3	3	4	3	3	4	3	3	4	3	3	3	4	3	3	3	3	3	3	3	3	4	1	2	2	1	2	4	1	1	4	1	4	3	2
男	67	城镇医保	轻度	是	2	61	1	1	3	1	1	4	4	4	3	3	3	4	3	3	4	3	3	4	3	3	4	3	3	4	3	3	3	4	3	3	2	1	1	2	2	4	4	1	1	4	1	3	2
男	81	城镇医保	中度	是	1	56	1	2	1	1	2	2	2	4	2	3	3	3	3	4	4	3	3	3	3	3	4	4	3	4	4	4	3	3	3	3	1	1	2	2	3	1	3	3	3	3	4	2	1
男	73	城镇医保	轻度	是	2	40	1	2	1	2	2	2	3	4	3	3	4	3	3	4	3	3	3	4	3	3	3	3	3	4	3	4	3	4	3	4	1	2	2	1	2	2	3	2	2	1	1	3	1
[truncated: 42 more columns]
